# Supplementary material
Source: PubMed Central journal article supplement (PMC3861717)

## Supplemental Figures legends:

**Fig. S1. Silencing of the endogenous *Cloroplastos alterados* gene (*GbCLA1*) in cotton by tobacco rattle virus (TRV)-mediated virus-induced gene silencing (VIGS).** (A) The cotyledons of 10-day-old seedlings of *G. barbadense* cv. '7124' were hand-infiltrated with *Agrobacterium* carrying either *TRV:GbCLA1* or VIGS-vector control (*TRV:00*). The photobleaching phenotype was photographed at 20 d post-infiltration. RT-PCR analysis indicated that the transcripts of *GbCLA1* were reduced 12 d after infiltration. (B) Albino phenotypes were firstly observed after 10 d after infiltration and the tender leaves displayed a more obvious photobleaching phenotype.

**Fig. S2. The relative percentages of three groups of proteins with different expression patterns and GO functional classification analysis of identified proteins.** (A) The relative percentages of three groups of proteins with different regulated patterns (up-regulated, down-regulated and other regulatory patterns). (B) GO functional classification analysis on differentially expressed proteins based on level 2 biological processes. Histograms represent the functional distribution, which is expressed as a percentage of the amount of proteins.

**Fig. S3. qPCR analysis of gossypol metabolic-related genes transcripts in control and MeJA treatments.** *GbFPS*, *GbCYP706B1*, *GbCAD1* and *WRKY1*, which were involved in gossypol metabolism, were detected at the transcriptional levels by qPCR. Error bars represent the standard deviation for three independent experiments, and three technical replicates were analyzed.

Supplemental Figures:

Fig. S1

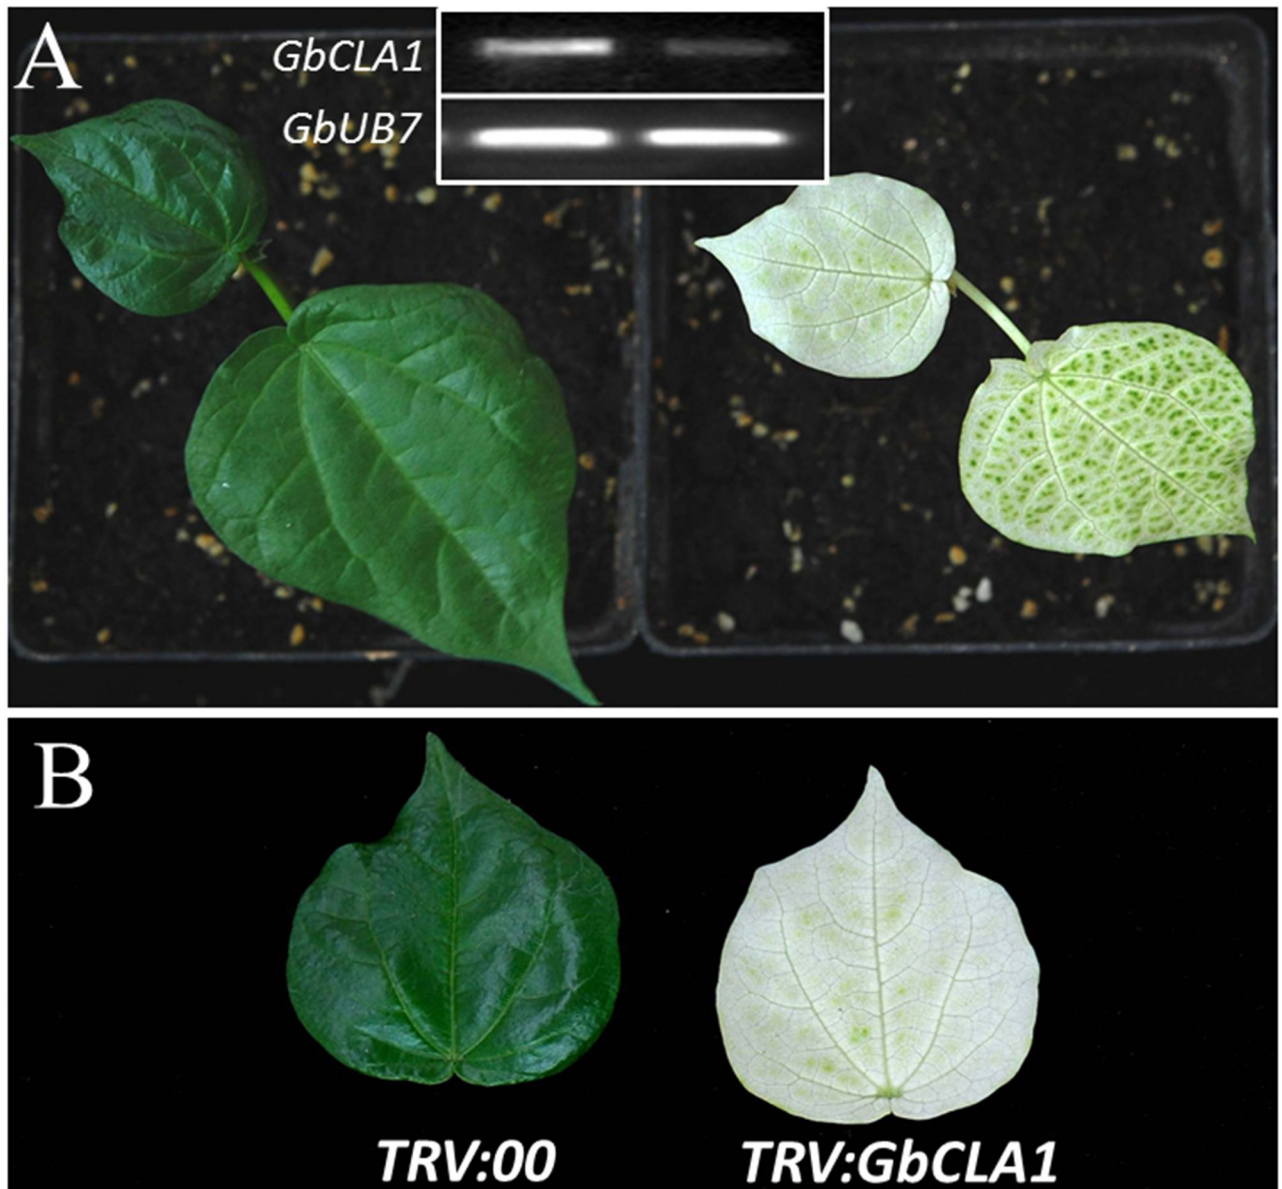

Fig. S2

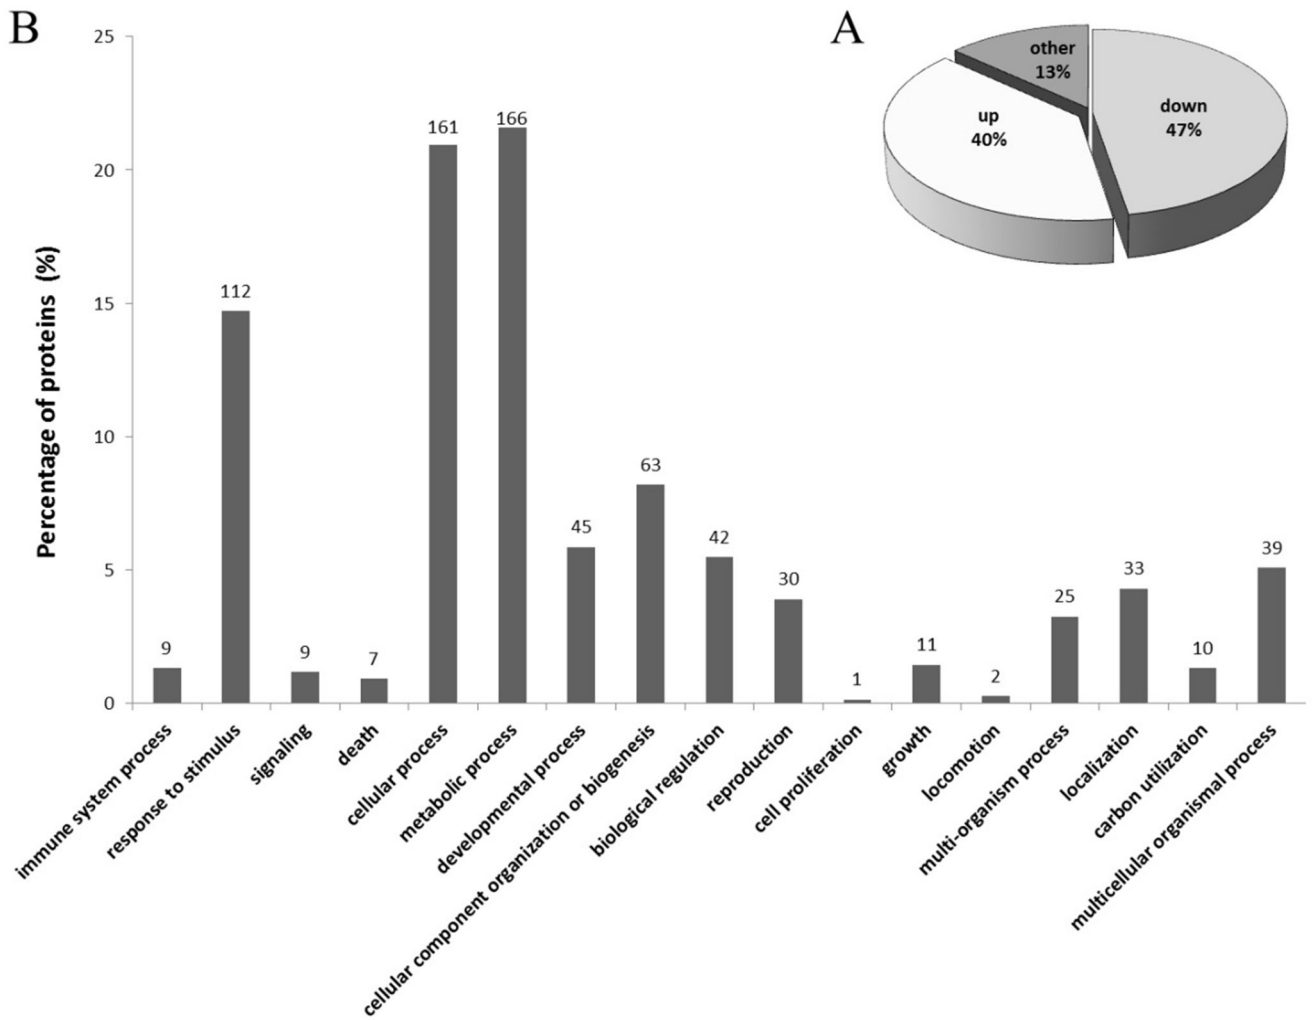

Fig. S3

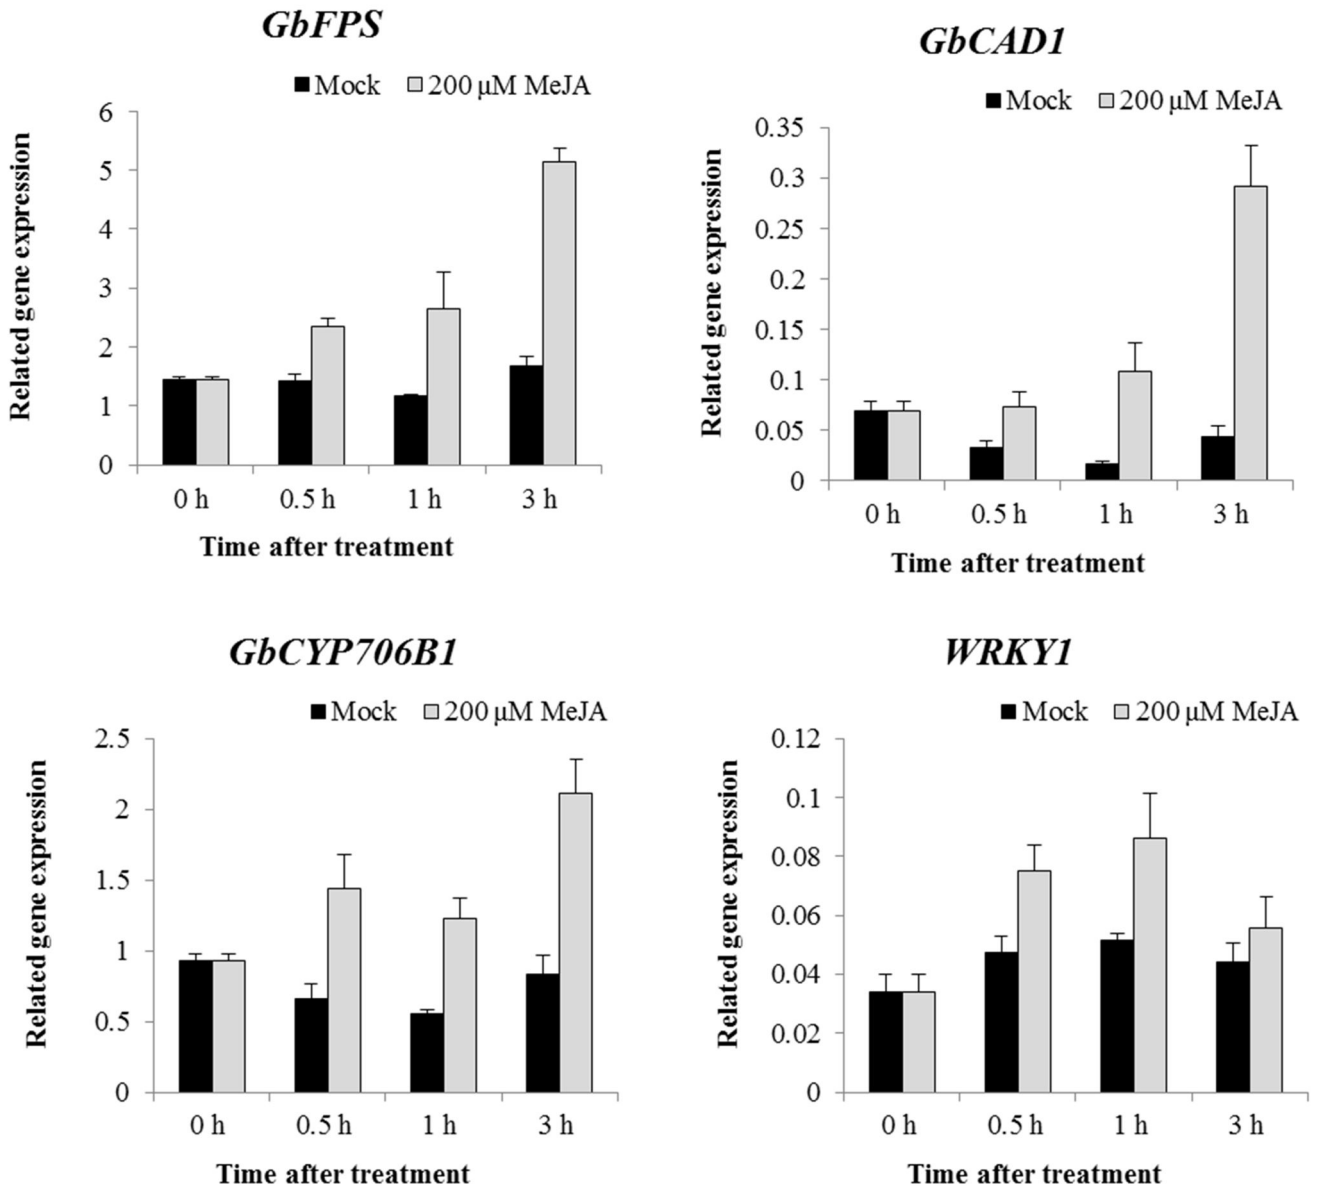

## Supplemental tables

Table S1. Primers used for RT

| Genes              | Sequences                                                    | Annealing Temp.(°C) | Length of amplified fragments (bp) |
|--------------------|--------------------------------------------------------------|---------------------|------------------------------------|
| <i>GbCAD1</i>      | 5'-TACCATAACAACAATGATGCCGAG<br>5'-TCCACCACCTACAAATCTCGCTTA   | 58.9                | 472                                |
| <i>Gb14-3-3c</i>   | 5'-ATCGGTGCTCGCCGTGCTTC<br>5'-TCGGCGTTGGCAATGTCCTG           | 59.2                | 329                                |
| <i>Gb14-3-3d</i>   | 5'-GCCGTGCTTCCTGGAGGATTG<br>5'-GCGTATTCTCAGCAGCGGCTTTC       | 58.4                | 279                                |
| <i>GbSSI2</i>      | 5'-CGCCACGAGACAGCATACTAA<br>5'-CAGAAACCCAACCTGAATGGAACAC     | 57.6                | 382                                |
| <i>GbLOX1</i>      | 5'-ACACGATGAACATCAATGCCTT<br>5'-TCTCGGAGTTCTTTCCACCAG        | 59.2                | 361                                |
| <i>GbJaz1</i>      | 5'-AAAAGCCTCAAAAAGGAAGACC<br>5'-AAGGATAGGATCACCGCAAAA        | 59.1                | 203                                |
| <i>GbJar1</i>      | 5'-TTTGCTGGAACCGCTACGACC<br>5'-TGACATTAGGGAAAAGCTCCGG        | 63.2                | 415                                |
| <i>GbJaz3</i>      | 5'-TTCGCTTTGCCTTCGGTTATT<br>5'-TGCCTACTCGTTGCCTGTTGT         | 60.7                | 457                                |
| <i>GbJaz6</i>      | 5'-TGGTGGTCAAGTGGCAGTATTT<br>5'-ATCGGGTTTAGGTGGCAGAGT        | 59.6                | 391                                |
| <i>GbPR4</i>       | 5'-CAGGAGAAGGAGCGACTGTGA<br>5'-TCCCACATCCAAATCTAACCC         | 58.8                | 284                                |
| <i>GbBZR1</i>      | 5'-GGACTGTTGAACCCGATGGCACTA<br>5'-CAGGAGCACTGATGGAACCACTATG  | 64.9                | 285                                |
| <i>GbBR11</i>      | 5'-CACAGCGGAAATGGAAAC<br>5'-TAAACATCGCCCTTGGTG               | 59.6                | 438                                |
| <i>GbBIN2</i>      | 5'-TATGGCAGAGCGTGAGT<br>5'-GTGGCATTCTTTGATTAG                | 58.5                | 293                                |
| <i>GbUB7</i>       | 5'-GACTCTACTCAATCCCCACCAGCCT<br>5'-CCGCACCTTAGCCGACTACAACATC | 58.5                | 321                                |
| <i>GbCYP706B1</i>  | 5'-TGACTGATCATGAGAAGCT<br>5'-GTGCTGGAGAT TTGATGGT            | 59.5                | 239                                |
| <i>GbFPS</i>       | 5'-GCGGATCTCAGGTCAGCATTT<br>5'-TCGGCAATCTAAACCAACAAGG        | 58.6                | 334                                |
| <i>GbdHG-6-OMT</i> | 5'-AATCCCTTCTGCATAACGCCTA<br>5'-GTCCAATCCCTCAAATGCCC         | 61.2                | 255                                |

Table S2. Primers used for qRT

| Genes             | Sequences                                                           | Annealing Temp.(°C) | Length of amplified fragments (bp) |
|-------------------|---------------------------------------------------------------------|---------------------|------------------------------------|
| <i>Gb14-3-3c</i>  | 5'-AGTCTCTGCCTCCGCCGACAACG<br>5'-TGCTCAATGGAGGAGATGATGCG            | 66.9                | 123                                |
| <i>Gb14-3-3d</i>  | 5'-ACTTCTTCGTGATAACCTTACTTTGTGGAC<br>5'-TCGAAGATTAGGGATTTTACTGTTGTT | 61.8                | 119                                |
| <i>GbLOX1</i>     | 5'-GCTTATGTTGCTGTAAATGACTCTGG<br>5'-CACACTAAGTTGTCGGTTCGTTG         | 60.1                | 111                                |
| <i>GbAOS</i>      | 5'-TGCCACCTGGTCCTTTCATTTC<br>5'-GCGTGTTTGGGCTCGGAAGGGTTCG           | 63.7                | 193                                |
| <i>GbOPR3</i>     | 5'-AGAGGTCCACTCCTGGCGGCTT<br>5'-CCACCTGTTCTTCATTGTAGATTCC           | 61.3                | 105                                |
| <i>GbMYC2</i>     | 5'-GCTCCGCCACTACCGTGCTC<br>5'-CTCGAAGCACTTTTTTACGGTGTTT             | 63.9                | 129                                |
| <i>GbJaz1</i>     | 5'-AGCCTCAAAAAGGAAGACCTCAAAC<br>5'-TGGCTGCTCAATCACCATAGTAATC        | 62.6                | 109                                |
| <i>GbJaz3</i>     | 5'-TGATTTTGCTCAAGGAGATAACGCT<br>5'-TGATTGCCTACTCGTTGCCTGT           | 62.2                | 138                                |
| <i>GbJaz6</i>     | 5'-GGCATCAATATGGCGGTTTCAGGAC<br>5'-TTCATCGGGTTTAGGTGGCAGAGT         | 66.1                | 158                                |
| <i>GbPR4</i>      | 5'-GAGGGTAAGAACTCAAGGACTGG<br>5'-CTCCATCAGTGTCCAATCGGTT             | 60.8                | 115                                |
| <i>GbNPR1</i>     | 5'-CTAGCTTGCGGAGGGATTGATAACC<br>5'-GAGATGGCTGACCTGTCAAACCTGC        | 64.9                | 128                                |
| <i>GbPR1</i>      | 5'-AAGAATGTGGGTTAGTGAGAGGGT<br>5'-ACCACTTGAGTATAATGCCCGC            | 60.3                | 90                                 |
| <i>GbPR5</i>      | 5'-AAGGAGTCCACCACAATCACCG<br>5'-CTGGCACTGCTATGGCTCGTAT              | 61.2                | 102                                |
| <i>GbCAD1</i>     | 5'-AACCAGAAAAAGGCTGCAACTTCAG<br>5'-TCCTTATTGGAAGAAAGAGGGTGATG       | 64.4                | 112                                |
| <i>GbFPS</i>      | 5'-GCTACCGCTGTTGAAAGATGG<br>5'-TCGGCAATCTAAACCAACAAGG               | 63.2                | 132                                |
| <i>GbCYP706B1</i> | 5'-CAAAGGGCACCAGGGTCTTC<br>5'-ACCGAGAGATACTCCGGCACAC                | 64.0                | 107                                |
| <i>WRKY1</i>      | 5'-GCTGAATGTGAGGATTATGGTGCCA<br>5'-TCAGAAGGATTTGTGCGGACTTGAACC      | 60.9                | 121                                |
| <i>GbUB7</i>      | 5'-GAAGGCATTCCACCTGACCAAC<br>5'-CTTGACCTTCTTCTTGTGCTTG              | 58.5                | 198                                |

Table S3. Primers used for VIGS

| Genes            | Sequences                                                                                | Annealing Temp.(°C) | Length of amplified fragments (bp) |
|------------------|------------------------------------------------------------------------------------------|---------------------|------------------------------------|
| <i>GbCAD1</i>    | 5'-CGACGACAAGACCCTTACCATAACAACAATGATGCCGAG<br>5'-GAGGAGAAGAGCCCTTCCACCACCTACAAATCTCGCTTA | 61.9                | 472                                |
| <i>Gb14-3-3c</i> | 5'-CGACGACAAGACCCTATCGGTGCTCGCCGTGCTTC<br>5'-GAGGAGAAGAGCCCTTCGGCGTTGGCAATGTCCTG         | 67.2                | 329                                |
| <i>Gb14-3-3d</i> | 5'-CGACGACAAGACCCTGCCGTGCTTCCTGGAGGATTG<br>5'-GAGGAGAAGAGCCCTGCGTATTCTCAGCAGCGGCTTTC     | 66.4                | 279                                |
| <i>GbSSI2</i>    | 5'-CGACGACAAGACCCTCGCCACGAGACAGCATACTAA<br>5'-GAGGAGAAGAGCCCTCAGAAACCCA ACTGAATGGAACAC   | 62.6                | 382                                |

Table S4. MS/MS identification of differentially expressed protein spots on 2-DE gels from *G. barbadense* cv. '7124' inoculation with *V. dahliae*

| ssp no. <sup>a</sup> | Gi no. <sup>b</sup> | protein name                         | protein score | Ion score <sup>c</sup> /sequence <sup>d</sup>                                                                                               | Sequence Coverage | Matched <sup>e</sup> /Searched <sup>f</sup> | Species             | Experimental MM <sup>g</sup> (kD)/pI | Theoretical MM <sup>g</sup> (kD)/pI | Fold change <sup>h</sup> (ve/control) |
|----------------------|---------------------|--------------------------------------|---------------|---------------------------------------------------------------------------------------------------------------------------------------------|-------------------|---------------------------------------------|---------------------|--------------------------------------|-------------------------------------|---------------------------------------|
| 11                   | gi 48741806         | proteasome subunit alpha type 5      | 334           | 43/GVNTFSPEGR;73/LFQVEYAIEAIK;43/RITSPLLEPS SVEK;70/ITSPLLEPSSVEK;38/VETQNHK;41/VAPTYH LYTPSEVEAVITR;27/VAPTYHLYTPSEVEAVITRL                | 20%               | 7/117                                       | <i>G. raimondii</i> | 35.39/4.67                           | 34.56/5.36                          | 0.19                                  |
| 12                   | gi 5049781          | 14-3-3-like protein (14-3-3a)        | 115           | 115/AAQDIALDLDLAPTHPIR                                                                                                                      | 8%                | 1/160                                       | <i>G. hirsutum</i>  | 28.60/4.71                           | 22.87/5.74                          | 0.38                                  |
| 17                   | gi 13349772         | latex-abundant protein               | 293           | 118/SAEPGDFLVHYSGHGTR;71/EQIGDSSKPDSES ESGSGGFR;104/SFLHHTVQDAFESR;                                                                         | 23%               | 3/210                                       | <i>G. arboreum</i>  | 27.41/4.79                           | 25.94/5.18                          | 0.29                                  |
| 24                   | gi 109862253        | elongation factor 1                  | 384           | 54/ALNDFLSGK;83/AEAADDEDDLDFGDETEEDKK; 46/SSVLMVDPWDDDETDMK;33/KLEEAVR;76/SVE MPGLLWGASK;75/LVAVGYGIK                                       | 30%               | 7/158                                       | <i>G. hirsutum</i>  | 28.83/4.83                           | 27.83/4.89                          | 0.47                                  |
| 25                   | gi 5050340          | chalcone isomerase                   | 465           | 69/TLFLGGAGER;64/GLEIQGKFIK;104/SAVELTESVE FFR;79/VTMILPLTGQQYSEK;69/VTMILPLTGQQYSE K;43/VSENCVAIWK;34/AIEKFIEVFK;71/LLANSVLES              | 36%               | 8/193                                       | <i>G. hirsutum</i>  | 26.80/4.86                           | 24.27/5.77                          | 0.48                                  |
| 40                   | gi 48748039         | cysteine proteinase rd21a            | 269           | 39/VVSINDYEDVPVNDK;78/AVANQPVSVAIEAGG R;70/SFQLYQSGIFDGK;41/GKDYWIVK;41/NSWGSS WGEAGYIR                                                     | 22%               | 5/108                                       | <i>G. raimondii</i> | 26.91/4.51                           | 32.90/4.69                          | 0.05                                  |
| 112                  | gi 48797299         | glycine-rich ma-binding              | 304           | 132/LFVGGISYQTDDQGLR;40/YGEVIEAR;19/IIVDRE TGR;92/GFGFVYTSSEDASSALQALDGQTLHGR;21/ VNYATER                                                   | 31%               | 5/175                                       | <i>G. raimondii</i> | 32.50/4.49                           | 21.43/5.63                          | 0.24                                  |
| 123                  | gi 5049148          | 14-3-3-like protein (14-3-3b)        | 49            | 49/EQQVYLAR                                                                                                                                 | 4%                | 1/210                                       | <i>G. hirsutum</i>  | 33.01/4.76                           | 20.49/6.26                          | 0.47                                  |
| 127                  | gi 5046822          | 14-3-3 protein (14-3-3c)             | 148           | 70/VSASADNEELTVEER;78/SAQDIANAELAPTHPIR                                                                                                     | 15%               | 2/126                                       | <i>G. hirsutum</i>  | 34.71/4.78                           | 23.76/5.04                          | 0.35                                  |
| 133                  | gi 31073060         | iron binding protein                 | 162           | 51/ELNLVPTVPQMSLAR;66/LLNLHNVAER;45/ISEY VAQLR                                                                                              | 10%               | 3/210                                       | <i>G. hirsutum</i>  | 32.40/4.82                           | 37.49/5.76                          | 0.49                                  |
| 150                  | gi 48742511         | thiol protease aleurain-like protein | 214           | 112/YNGGLDTEEAYPYAK;102/NSWGAQWGDNGY FK                                                                                                     | 12%               | 2/158                                       | <i>G. raimondii</i> | 30.77/4.90                           | 27.09/7.16                          | 0.21                                  |
| 155                  | gi 48742486         | ran binding protein                  | 126           | 52/LEEVAVSTGEENEDPILDK;42/FDKEGNQWK;32/ FASVENCK                                                                                            | 11%               | 3/147                                       | <i>G. raimondii</i> | 33.26/4.92                           | 37.28/5.45                          | 2.85                                  |
| 161                  | gi 13356530         | elongation factor 1-beta             | 181           | 41/SSVLMVDPWDDDETDMK;46/SVEMPGLLWGASK ;65/LVAVGYGIK;29/NEYIQSCDIVAFNK                                                                       | 28%               | 4/210                                       | <i>G. arboreum</i>  | 29.20/4.60                           | 20.39/4.47                          | 0.33                                  |
| 206                  | gi 78323677         | proliferating cell nuclear antigen   | 382           | 52/SEGFEHYR;124/ADDGSDTVTFMFESPTQDK;44/L MDIDSEHLGIPEAEYHAIVR;83/LMDIDSEHLGIPEAE YHAIVR;25/MPSAEFAR;41/MPSAEFAR;57/GDIGTAN IVLR;26/IAEMGYIR | 24%               | 8/180                                       | <i>G. hirsutum</i>  | 38.07/4.75                           | 34.11/4.87                          | 0.29                                  |
| 212                  | gi 78323533         | 26s proteasome regulatory subunit    | 370           | 75/VHPLVIFNICDCYVR;95/VIGTLLGSVLPDGTVDIR; 21/EVIVGWYSTGLGVTGGSALIHDFYSR;109/EVSNPI HLTVDTGFR;70/AFVSVNLALGDR                                | 29%               | 5/210                                       | <i>G. hirsutum</i>  | 35.96/4.92                           | 32.04/5.36                          | 0.36                                  |
| 216                  | gi 78323733         | 20s proteasome subunit paf1          | 498           | 132/NQYDTDVTTWSPAGR;62/LFQVEYAMEAVK;129 /VDDHIGVAIAGLTADGR;121/NECINYSFTYESPLPV GR;55/RFENFTDSSR                                            | 25%               | 5/210                                       | <i>G. hirsutum</i>  | 36.89/4.90                           | 31.55/8.97                          | 0.39                                  |



|     |              |                                             |     |                                                                                                                                                                     |     |       |                     |            |            |      |
|-----|--------------|---------------------------------------------|-----|---------------------------------------------------------------------------------------------------------------------------------------------------------------------|-----|-------|---------------------|------------|------------|------|
| 225 | gi 5044774   | ubiquitin thioesterase otubain-like protein | 247 | 66/VLDQQYAAIR;32/TRGDGNCFFR;40/SFMFSYLEHI<br>LESQDR;60/SFMFSYLEHILESQDR;20/SRDQSIDYV<br>VMFFR;27/DQSISDYVVMFFR;42/FVTSGEIR                                          | 25% | 7/210 | <i>G. hirsutum</i>  | 40.27/4.77 | 26.94/5.82 | --   |
| 231 | gi 109860660 | ubiquitin thioesterase otubain-like protein | 200 | 58/VLDQQYAAIR;13/SFMFSYLEHILESQDR;91/EDSIS<br>QDELILR;38/FVTSGEIR                                                                                                   | 16% | 4/210 | <i>G. hirsutum</i>  | 40.35/4.81 | 32.79/9.42 | 0.20 |
| 232 | gi 78323677  | proliferating cell nuclear antigen          | 312 | 52/SEGFEHYR;55/ADDGSDTVTFMFESPTQDK;42/MP<br>SAEFAR;87/GDIGTANIVLR;36/QNTTVDKPEEATIE<br>MNEPVSLTFALR;40/YMNSFTK                                                      | 26% | 6/147 | <i>G. hirsutum</i>  | 38.18/4.72 | 34.11/4.87 | 0.25 |
| 233 | gi 5046822   | 14-3-3 protein                              | 59  | 59/SAQDIANAELAPTHPIR                                                                                                                                                | 8%  | 1/210 | <i>G. hirsutum</i>  | 36.28/4.81 | 23.76/5.04 | 0.20 |
| 314 | gi 84169310  | WD-repeat protein                           | 108 | 37/IWEADIIR;46/TIFSVHWSR;26/EGIIASGAADDAVR                                                                                                                          | 18% | 3/202 | <i>G. hirsutum</i>  | 45.13/4.76 | 19.07/5.62 | 0.24 |
| 318 | gi 164354844 | peroxidase                                  | 296 | 72/FALANVNSAR;18/SAVESSCSGVVSCADILAIAR;<br>92/DSVVLSSGGPTWR;44/CATFDNR;71/GLLGSDQILY<br>SSDLAVSTTK                                                                  | 21% | 5/158 | <i>G. hirsutum</i>  | 45.01/4.85 | 36.08/5.63 | 0.39 |
| 322 | gi 11207995  | 40s ribosomal protein sa                    | 137 | 17/RNDGIYIINLGK;16/FAQYTGCHAIAGR;93/HTPGT<br>FTNQLQTSFSEPR;11/LLILTDP                                                                                               | 29% | 4/189 | <i>G. arboreum</i>  | 46.11/4.90 | 19.42/8.74 | 0.25 |
| 328 | gi 5048825   | spermidine synthase                         | 194 | 49/VLVLDGVIQLTER;62/VLVIGGGDGGVLR;82/QYF<br>PDVAVGYDDPR                                                                                                             | 20% | 3/210 | <i>G. hirsutum</i>  | 44.88/4.88 | 21.34/4.70 | 0.31 |
| 338 | gi 48740287  | late embryogenesis abundant protein         | 405 | 50/LLSGLIPDAGTIHAHGEETVK;68/STYDDIKPGSIIP<br>YR;72/TGEIPIYPKPDIDMEK;68/FSWEETIAVLHLK;60<br>/DFGSALWDMIR;87/GHINVDTPFGAMK                                            | 35% | 6/158 | <i>G. raimondii</i> | 42.10/4.63 | 27.91/4.91 | --   |
| 405 | gi 164261933 | ankyrin repeat domain protein               | 371 | 38/HILDEIETGGPAAMMK;114/AALASGADKDEEDSE<br>GR;78/TALHFACGYGEVK;83/NTALHYAAGYGR;58/L<br>NNQHEVLK                                                                     | 19% | 5/148 | <i>G. hirsutum</i>  | 47.93/4.31 | 38.70/5.10 | 0.28 |
| 407 | gi 48748039  | cysteine proteinase rd21a                   | 236 | 25/LPDSVDWR;87/AVANQPVSVAIEAGGR;40/SFQLY<br>QSGIFDGK;84/NSWGSSWGEAGYIR                                                                                              | 17% | 4/192 | <i>G. raimondii</i> | 49.31/4.40 | 32.90/4.69 | N    |
| 411 | gi 78330968  | uv excision repair protein                  | 135 | 11/AAYNNPER;48/AVEYLYSGIPEQAEAPPVAR;23/N<br>SPQFQALR;52/LIQEHQGDFLR                                                                                                 | 16% | 4/102 | <i>G. hirsutum</i>  | 48.42/4.76 | 30.05/4.76 | 0.29 |
| 415 | gi 78332047  | uv excision repair protein                  | 275 | 43/AAYNNPER;85/AVEYLYSGIPEQAEAPPVAR;52/N<br>SPQFQALR;78/LIQEHQGDFLR;17/LEAMGFDR                                                                                     | 18% | 5/158 | <i>G. hirsutum</i>  | 47.72/4.85 | 31.43/4.58 | 0.38 |
| 417 | gi 164263296 | transaldolase                               | 623 | 70/AISSSNAYNDQFR;71/DIESAYWELVVK;64/LFEPI<br>YDQTDGGDGYVSVEVSPR;76/VTSVASFFVSR;79/AA<br>VAQAALAYR;109/TIDANVSEAEGIYSALEK;84/VGS<br>QLEDEGVESFKK;71/SFDSLLDTLQEK     | 25% | 8/136 | <i>G. hirsutum</i>  | 47.94/4.88 | 50.24/9.66 | 0.44 |
| 418 | gi 164263296 | transaldolase                               | 628 | 88/AISSSNAYNDQFR;24/DIESAYWELVVK;128/LFEPI<br>YDQTDGGDGYVSVEVSPR;81/YLHEVVDRPNVYIK;1<br>12/YEAVIDAYLDGLEASGLSDLSR;70/VTSVASFFVS<br>R;62/AAVAQAALAYR;63/SFDSLLDTLQEK | 26% | 8/210 | <i>G. hirsutum</i>  | 48.41/4.91 | 50.24/9.66 | 0.49 |
| 424 | gi 48817237  | nucleotide exchange factor                  | 53  | 53/AFYAVSALIR                                                                                                                                                       | 3%  | 1/210 | <i>G. raimondii</i> | 51.06/4.86 | 30.42/5.35 | --   |
| 502 | gi 48878188  | target of myb protein 1                     | 297 | 65/ELFQGNPADK;25/AFSEVAAER;55/LIDDPQTVV<br>NNR;30/ALMLIEAWGESTSELR;52/ALMLIEAWGEST<br>SELR;99/DNESLAPIFTPPR                                                         | 24% | 6/198 | <i>G. raimondii</i> | 56.15/4.73 | 28.40/5.11 | 0.44 |
| 506 | gi 48747592  | phosphoethanolamine methyltransferase       | 102 | 49/TYPDNSFDVIYSR;53/DTILHIQDKPALFR                                                                                                                                  | 10% | 2/154 | <i>G. raimondii</i> | 56.24/4.91 | 29.66/5.04 | 3.73 |
| 524 | gi 45438674  | peroxidase                                  | 170 | 170/SDQNLFSTEGADTIEIVNR                                                                                                                                             | 17% | 1/132 | <i>G. hirsutum</i>  | 54.39/4.77 | 11.71/4.05 | N    |
| 616 | gi 48742071  | tubulin beta                                | 416 | 102/IDVYYNEASGGR;21/SGPIGQIFRPNFVFGQSGA<br>GNNWAK;152/GHYTEGAELIDAVLDVVR;46/FPGQL<br>NSDLR;58/LAVNLIPFPR37/LHFFMVGFAPLTSR                                           | 30% | 6/98  | <i>G. raimondii</i> | 58.21/4.87 | 32.92/5.28 | N    |

|      |              |                                                      |     |                                                                                                                                                                    |     |        |                     |            |            |      |
|------|--------------|------------------------------------------------------|-----|--------------------------------------------------------------------------------------------------------------------------------------------------------------------|-----|--------|---------------------|------------|------------|------|
| 706  | gi 21091341  | protein disulfide isomerase                          | 293 | 39/GYPTVYFR;112/LAPILEEVAIHYEK;142/LDATAN DIVDPNFDVR                                                                                                               | 17% | 3/138  | <i>G. arboreum</i>  | 61.74/4.80 | 24.49/5.53 | 0.38 |
| 707  | gi 78324178  | rubisco subunit binding protein                      | 405 | 66/EIAFDQSSR;87/LADAVGLTLGPR;67/NVVLDEFGS PK;80/AIELPNAMENAGAALIR;51/GYISPOFVTNPEK; 54/LICEFENAR                                                                   | 23% | 6/210  | <i>G. hirsutum</i>  | 62.85/4.82 | 32.30/8.31 | 0.48 |
| 709  | gi 5047127   | glutamine synthetase                                 | 214 | 7/SMREDGGFEVIK;28/AILNLSLR;82/HKEHISAYGEG NER;97/HETASINTFSWGVANR                                                                                                  | 26% | 4/210  | <i>G. hirsutum</i>  | 61.57/4.87 | 21.09/8.27 | 0.49 |
| 711  | gi 32479441  | probable nucleoredoxin 1-like                        | 102 | 55/MPWLAIPFSDSEAR;47/VLTEEGVEIIR                                                                                                                                   | 6%  | 2/158  | <i>G. hirsutum</i>  | 66.13/4.89 | 42.79/4.98 | 0.29 |
| 717  | gi 13248313  | tetratricopeptide repeat domain-containing protein   | 68  | 57/TEFFLNHEALQQVIR;11/LVYTIYAR                                                                                                                                     | 12% | 2/111  | <i>G. arboreum</i>  | 64.53/4.83 | 20.81/7.89 | 0.19 |
| 719  | gi 13350678  | protein disulfide isomerase                          | 113 | 91/VDANEESNKDLANEYEV;22/SAEDASNFIDEK                                                                                                                               | 13% | 2/96   | <i>G. arboreum</i>  | 63.35/4.80 | 25.58/5.30 | N    |
| 720  | gi 13350678  | protein disulfide isomerase                          | 156 | 137/VDANEESNKDLANEYEV;20/LRSDYEFGHTLD AK                                                                                                                           | 14% | 2/210  | <i>G. arboreum</i>  | 63.11/4.88 | 25.58/5.30 | N    |
| 804  | gi 78341095  | stromal 70 kda heat shock-related chloroplastic-like | 393 | 114/LSFKDIDEVILVGGSTR;109/DIDEVILVGGSTR;64 /IPAVQELVR;105/SEVFSTAADGQTSVEINVLQGER                                                                                  | 16% | 4/158  | <i>G. hirsutum</i>  | 70.45/4.84 | 32.97/4.64 | 0.33 |
| 1008 | gi 193219783 | triosephosphate isomerase                            | 716 | 55/FFVGGNWK;46/IEVSAQNSWIGK;78/GGAFTGEIS VEQLK;64/WVILGHSE;68/HVIGEDDQFIGK;79/HVI GEDDQFIGKK;50/TFDVCFFQLK;100/VATPQQAQEV HVAVR;94/EEDIDGFLVGGASLK;83/GPEFATIVNSVT | 32% | 10/210 | <i>G. hirsutum</i>  | 28.81/5.08 | 37.38/6.36 | 2.25 |
| 1028 | gi 84144761  | dienelactone hydrolase family                        | 193 | 70/DHGPKDGYEDAK;61/VPIAILGAEQDHISPELLK; 39/QFDEILK;23/VGHGWSVR                                                                                                     | 18% | 4/144  | <i>G. hirsutum</i>  | 27.64/5.04 | 28.10/5.23 | N    |
| 1104 | gi 11209486  | remorin family                                       | 62  | 36/STEVSVDRDAVLAR;26/ISLINAWEESEK                                                                                                                                  | 12% | 2/210  | <i>G. arboreum</i>  | 31.16/5.00 | 23.13/7.08 | 0.40 |
| 1106 | gi 31407188  | protein in2-1 homolog b-like protein                 | 414 | 46/LYLAYPCPYAQR;36/LVPLNLQNRPAWYK;130/D ADAAFDHLETALAK;53/FQIYLSEVFNYDLTAGRPK; 107/VAAWIEAADKIDAYK                                                                 | 29% | 6/158  | <i>G. hirsutum</i>  | 30.41/5.03 | 29.25/6.84 | 0.42 |
| 1114 | gi 11209486  | remorin family protein                               | 209 | 44/STEVSVDRDAVLAR;38/RISLINAWEESEK;61/ISLI NAWEESEK;42/KLSSIAAWENTK;24/AAIEAELKR                                                                                   | 23% | 5/201  | <i>G. arboreum</i>  | 31.23/5.07 | 23.13/7.08 | 0.41 |
| 1115 | gi 164316384 | protein in2-1 homolog b-like protein                 | 421 | 67/ATETVESLPPTLEANAEQPPLFDGTTR;58/LYTSYP CPFAQR;46/LVPLNLQNRPAWYK;65/KYDDGPFLG R;69/YDDGPFLGR;81/DFSLADIAYIPFVER;35/YDTI                                           | 28% | 7/158  | <i>G. hirsutum</i>  | 31.90/5.08 | 36.29/5.93 | 8.33 |
| 1124 | gi 13352433  | 20s proteasome subunit paf1                          | 95  | 56/NQYDTDVTTWSPAGR;39/NECINYNFTYESPLPVG R                                                                                                                          | 15% | 2/158  | <i>G. arboreum</i>  | 34.94/4.97 | 24.60/9.51 | N    |
| 1126 | gi 5046691   | ran binding protein                                  | 115 | 43/FDKEGNQWK;72/FQEVAESQKPK                                                                                                                                        | 11% | 2/97   | <i>G. hirsutum</i>  | 33.92/5.03 | 20.56/5.49 | N    |
| 1132 | gi 78328997  | tubulin folding cofactor b                           | 156 | 71/LQIEGDASVLLR;72/YSISEDEYNKR;13/EQMASQN PSEFR                                                                                                                    | 11% | 3/210  | <i>G. hirsutum</i>  | 31.81/5.11 | 34.70/8.04 | 0.23 |
| 1145 | gi 5044913   | methylthioadenosine nucleosidase                     | 81  | 27/FQLIENPHSSFPK;54/IPIPVFDLYGVGLR                                                                                                                                 | 12% | 2/209  | <i>G. hirsutum</i>  | 32.51/4.95 | 23.14/9.55 | 0.18 |
| 1150 | gi 78341942  | ribose-5-phosphate isomerase                         | 43  | 43/LEGLFNELGCEAK                                                                                                                                                   | 4%  | 1/194  | <i>G. hirsutum</i>  | 29.12/4.96 | 29.74/7.14 | 0.11 |
| 1207 | gi 48808146  | glycosyl hydrolase family 38 protein                 | 94  | 19/TFYTDSNGR;57/EFSVLVDR;17/SLGGSSIVDGQIE LMLHR                                                                                                                    | 12% | 3/140  | <i>G. raimondii</i> | 35.91/4.99 | 31.61/4.82 | 5.43 |
| 1217 | gi 11209293  | 20s proteasome subunit paf1                          | 241 | 70/NQYDTDVTTWSPAGR;120/VDDHIGVAIAGLTAD GR;51/NECINYSFTYESPLPVG                                                                                                     | 23% | 3/133  | <i>G. arboreum</i>  | 38.00/5.07 | 23.90/9.47 | 2.84 |

|      |              |                                                        |     |                                                                                                                          |     |       |                      |            |            |      |
|------|--------------|--------------------------------------------------------|-----|--------------------------------------------------------------------------------------------------------------------------|-----|-------|----------------------|------------|------------|------|
| 1231 | gi 48748981  | adenine nucleotide<br>alpha hydrolases-like<br>protein | 194 | 79/FPFSTPIAGSQR;54/IAIAVDLSDESAYAVR;39/LQIT<br>PNSTNNR;22/LCLEVER                                                        | 16% | 4/153 | <i>G. raimondii</i>  | 37.88/5.03 | 31.03/5.40 | N    |
| 1240 | gi 54119904  | probable<br>carboxylesterase 2-                        | 55  | 28/GWLYYDK;27/LASFFNQGK                                                                                                  | 6%  | 2/95  | <i>G. raimondii</i>  | 41.80/5.02 | 32.40/5.37 | 2.91 |
| 1313 | gi 48818461  | transducin family<br>protein                           | 185 | 59/SHILVTAEDESGIHIWDLR;86/EPWIFASLSYDGR;4<br>1/VVVESVKPFLSR                                                              | 19% | 3/122 | <i>G. raimondii</i>  | 46.18/5.10 | 26.49/5.57 | 0.34 |
| 1320 | gi 345461935 | desoxyhemigossypol-<br>6-O-<br>methyltransferase       | 80  | 14/ILVHSDFFAR;45/QKLDNDAQEEGYVLTNSSR;21/<br>LFLAAGFSSFK                                                                  | 10% | 3/158 | <i>G. barbadense</i> | 43.27/5.02 | 40.86/5.23 | 0.34 |
| 1335 | gi 13350365  | transaldolase-like<br>protein                          | 144 | 46/LAYDTHGIIR;37/LYDEIAVPPER;61/IPSTWQGIEA<br>SR                                                                         | 14% | 3/210 | <i>G. arboreum</i>   | 43.52/4.99 | 24.86/5.09 | N    |
| 1406 | gi 78324960  | 3-isopropylmalate<br>dehydrogenase                     | 118 | 67/LLKPETGLLQLR;51/ELTGGIYFGKPR                                                                                          | 8%  | 2/158 | <i>G. hirsutum</i>   | 47.41/5.02 | 31.78/8.31 | 2.05 |
| 1434 | gi 78354144  | nucleoporin nup43                                      | 105 | 37/TPGGPVLQFK;68/TSGIVHSIDIHPSR                                                                                          | 14% | 2/158 | <i>G. hirsutum</i>   | 48.85/5.04 | 18.41/8.48 | 3.66 |
| 1502 | gi 5050625   | alpha-tubulin                                          | 326 | 71/AVFVDLEPTVIDEVR;65/QLFHPEQLISGK;74/QLF<br>HPEQLISGKEDAANNFAR;67/EIVDLCLDR;48/SLDIE<br>RPTYTNLNR                       | 31% | 5/158 | <i>G. hirsutum</i>   | 55.73/4.99 | 20.52/6.22 | 3.62 |
| 1507 | gi 48752349  | alpha-tubulin                                          | 549 | 60/EIVDLCLDR;90/QLFHPEQLISGK;112/LISQISSLTT<br>SLR;39/SLDIERPTYTNLNR;113/AVFVDLEPTVIDEVR<br>;137/FDGAINVDVTEFQTNLVPYPR   | 30% | 6/146 | <i>G. raimondii</i>  | 55.38/5.03 | 31.65/6.07 | N    |
| 1513 | gi 48814087  | aminoacylase-1                                         | 155 | 46/RIEEWAPASR;46/IGKPEILSGATDAR;64/GINVYE<br>SIEAYTSYIPPGR                                                               | 17% | 3/158 | <i>G. raimondii</i>  | 53.31/5.11 | 29.75/7.24 | N    |
| 1516 | gi 48780251  | tubulin alpha-7 chain                                  | 437 | 71/AVFLDLEPTVIDEVR;93/QLFHPEQLISGK;83/LAD<br>NCTGLQGFLVFHAVGGGTGSGLSLLER;54/LVSQ<br>VISSLTASLR;136/FDGALNVDVNEFQTNLVPYPR | 34% | 5/160 | <i>G. raimondii</i>  | 54.83/5.10 | 30.33/5.43 | N    |
| 1517 | gi 5050625   | alpha-tubulin                                          | 70  | 28/AVFVDLEPTVIDEVR;23/EIVDLCLDR;19/SLDIERP<br>TYTNLNR                                                                    | 20% | 3/140 | <i>G. hirsutum</i>   | 55.60/5.12 | 20.52/6.22 | 4.18 |
| 1524 | gi 315069289 | alpha tubulin 1                                        | 389 | 72/AVFVDLEPTVIDEVR;90/QLFHPEQLISGK;34/SLDI<br>ERPTYTNLNR;47/LVSQVISSLTASLR;80/FDGALNVD<br>VTEFQTNLVPYPR;67/TIQFVDWCPTGFK | 29% | 6/151 | <i>G. barbadense</i> | 54.67/5.07 | 34.24/6.27 | N    |
| 1526 | gi 48748259  | alpha-tubulin                                          | 402 | 88/QLFHPEQLISGK;117/LISQISSLTTSLR;89/AVFVD<br>LEPTVIDEVR;108/FDGAINVDITEFQTNLVPYPR                                       | 21% | 4/160 | <i>G. raimondii</i>  | 55.28/5.14 | 32.26/5.44 | N    |
| 1604 | gi 48777881  | glucose-6-phosphate<br>isomerase                       | 377 | 120/QGVAITQENSLLDNTAR;28/IEGWVAR;28/FPMF<br>DWVGGR;86/GSTDQHAYIQQLR;115/EGVHNFFVTFI                                      | 23% | 5/203 | <i>G. raimondii</i>  | 59.23/4.97 | 29.10/4.87 | 0.40 |
| 1615 | gi 48777881  | glucose-6-phosphate<br>isomerase                       | 86  | 48/QGVAITQENSLLDNTAR;38/GSTDQHAYIQQLR                                                                                    | 11% | 2/158 | <i>G. raimondii</i>  | 59.41/5.03 | 29.10/4.87 | 2.92 |
| 1617 | gi 13353515  | phosphoesterase<br>family protein                      | 179 | 39/YVDNFHQYDLSFKR;52/LPNYVVIEPR;18/EIYEAL<br>R;70/DAWAGSFDIVVNR                                                          | 19% | 4/158 | <i>G. arboreum</i>   | 60.73/5.05 | 26.53/6.15 | 0.40 |
| 1623 | gi 48803376  | RNA recognition<br>motif-containing                    | 65  | 43/QVEFYFSDSNIPR;22/TIAASPFENVK                                                                                          | 9%  | 2/158 | <i>G. raimondii</i>  | 59.13/5.09 | 28.90/4.85 | 5.63 |
| 1628 | gi 54123077  | beta-tubulin                                           | 167 | 136/GHYTEGAELVDSVLDVVR;30/IREEYPDR                                                                                       | 10% | 2/210 | <i>G. hirsutum</i>   | 58.19/5.10 | 27.64/5.85 | 0.34 |
| 1651 | gi 21103494  | fas-associated factor<br>2-b-like                      | 57  | 34/VLEESAPVLAAR;23/LREEQDAAYR                                                                                            | 10% | 2/158 | <i>G. arboreum</i>   | 60.40/4.97 | 24.37/7.78 | 2.23 |
| 1652 | gi 13354972  | vacuolar atpase b<br>subunit                           | 59  | 46/QIYPPINVLPSLSR;13/NIFQSLDLAWTLLR                                                                                      | 10% | 2/87  | <i>G. arboreum</i>   | 57.95/5.04 | 28.38/9.91 | ++   |
| 1804 | gi 78343945  | ubiquitin carboxyl-<br>terminal hydrolase              | 235 | 124/KLDVYIDVPDVIDISHIR;111/VDTLISFGFQEEIAR                                                                               | 11% | 2/210 | <i>G. hirsutum</i>   | 79.24/4.96 | 31.08/4.98 | 0.48 |

|      |              |                                                |     |                                                                                                                                                 |     |       |                     |            |            |       |
|------|--------------|------------------------------------------------|-----|-------------------------------------------------------------------------------------------------------------------------------------------------|-----|-------|---------------------|------------|------------|-------|
| 2005 | gi 13356871  | proteasome subunit beta type                   | 634 | 56/NCFAIASDR;36/NCFAIASDRR;64/RLGVQLQTIATDFQR;126/LGVQLQTIATDFQR;161/LFLGLSGLATDAQTLYQR;79/DFVVAGTASESLYGACESMFK;111/DCLSGWGGHVYVVTPEVK         | 31% | 7/210 | <i>G. arboreum</i>  | 24.60/5.22 | 29.68/5.36 | 2.57  |
| 2016 | gi 84144761  | dienelactone hydrolase family                  | 147 | 58/DHGPDKGYEDAK;28/QFDEILK;32/ASEVDSFVK;28/VGHGWSVR                                                                                             | 14% | 4/142 | <i>G. hirsutum</i>  | 28.09/5.17 | 28.10/5.23 | 4.02  |
| 2102 | gi 164310401 | type 2 ribosome-inactivating protein precursor | 161 | 44/DLYNALTER;39/SGDIPILPPR;78/LVYDAQELVLS TLR                                                                                                   | 11% | 3/158 | <i>G. hirsutum</i>  | 31.44/5.16 | 31.48/5.27 | 3.37  |
| 2105 | gi 48743646  | isopentenyl diphosphate isomerase              | 608 | 33/YELLQQR;99/ESELIENHLGVR;108/KLLDELGIP AEDVPVDQFVPLSR;93/LLDELGIPAEDVPVDQFVPLSR;107/WGEHELDYLLFIVR;106/DVNVHPNPDEVAEAK;36/LSPWFR;26/LVVDNFLFK | 34% | 8/210 | <i>G. raimondii</i> | 32.58/5.21 | 30.19/8.50 | 0.45  |
| 2123 | gi 48811023  | protein phosphatase 2c                         | 177 | 18/SSMEDFYETR;30/QNLFSNLIR;47/DAGSTASTAIL VGDR;40/GGNAFAVSR;41/DHKPDQSDER                                                                       | 21% | 5/158 | <i>G. raimondii</i> | 34.06/5.18 | 27.21/5.75 | 13.06 |
| 2124 | gi 48812639  | (+)-delta-cadinene synthase (GbCAD1)           | 310 | 49/LAFIDSVQR;5/EIEDELENIYHNNNDAENDLYTTSLR;87/GLLELYQASYLR;105/HYLSVYQDIESHNK;39/IDFNMLQFLHR;63/IDFNMLQFLHR                                      | 24% | 6/210 | <i>G. raimondii</i> | 31.06/5.14 | 34.02/6.56 | 3.65  |
| 2205 | gi 164253821 | phenazine biosynthesis                         | 647 | 98/YVVDVAFTNSAFK;108/GNPAAVCLLEEER;75/GNPAAVCLLEEERDEK;14/ITNSTSPNTR;35/TTTADDIFV VLPSGK;159/GLIVSGAAPSDFDFISR;63/LELVAHAASPR;94/GGIVNIHFDEQNQR | 30% | 8/210 | <i>G. hirsutum</i>  | 36.85/5.17 | 35.14/5.13 | 2.46  |
| 2246 | gi 109831589 | 2-keto-3-deoxy-l-rhamnonate aldolase-like      | 97  | 20/AVATTNTPAIR;33/LPESSAVWAK;26/GYHMOVSG AIDVGLFR;18/NAAVEDVRK                                                                                  | 17% | 4/117 | <i>G. hirsutum</i>  | 36.91/5.20 | 28.92/5.48 | 10.77 |
| 2250 | gi 13352653  | dna-damage-repair toleration protein           | 66  | 66/SLNIEVEDLGITSYYNIGAEVGR                                                                                                                      | 10% | 1/158 | <i>G. arboreum</i>  | 37.14/5.16 | 22.53/5.07 | 0.10  |
| 2320 | gi 48739156  | caffeic acid o-methyltransferase               | 289 | 44/ELASQLPTSNPDAPVMLDR;43/LLATYSILTCSLR;63/DAVLEGGIPFNK;42/AYGMTAFEYHGTDPR;30/AYGMTAFEYHGTDPR;96/ILETYDGFEGLK                                   | 27% | 6/158 | <i>G. raimondii</i> | 45.47/5.26 | 28.80/5.77 | 0.48  |
| 2415 | gi 5046349   | s-adenosylmethionine                           | 136 | 45/TIFHLNPSGR;60/FVIGGPHGDAGLTGR;31/TAAYG HFGR                                                                                                  | 17% | 3/158 | <i>G. hirsutum</i>  | 50.34/5.26 | 21.92/8.81 | 2.08  |
| 2511 | gi 82756479  | alpha-tubulin                                  | 198 | 86/AIFVDLEPTVIDAVR;28/QLFHPEQLISGK;54/QLFHPEQLISGKEDAANNFAR;31/SLDIERPTYTNLNR                                                                   | 21% | 4/210 | <i>G. hirsutum</i>  | 54.25/5.24 | 25.61/5.65 | 0.05  |
| 2518 | gi 5049948   | tubulin alpha                                  | 197 | 65/AIFVDLEPTVIDEVR;30/QLFHPEQLISGK;30/QLFHPEQLISGKEDAANNFAR;23/EDAANNFAR;16/EIVDLC LDR;34/SLDIERPTYTNLNR                                        | 30% | 6/158 | <i>G. hirsutum</i>  | 54.63/5.16 | 21.37/5.72 | N     |
| 2525 | gi 78345852  | aha1 domain-containing protein                 | 288 | 94/SLSDLTILDGQGNLR;58/VDGEAYVNIR;81/FGSWP DGIDSTVR;55/LVFNEPEPGVTIHK                                                                            | 16% | 4/210 | <i>G. hirsutum</i>  | 54.72/5.18 | 36.24/8.46 | --    |
| 2611 | gi 48801055  | n-carbamoyl-l-amino acid                       | 64  | 64/QIDELSTFSDTPAPSVTR                                                                                                                           | 6%  | 1/158 | <i>G. raimondii</i> | 59.00/5.25 | 31.56/5.04 | 0.49  |
| 2633 | gi 78328524  | chaperonin cpn60-mitochondrial-like isoform 2  | 67  | 16/SIEFKDR;52/GYISPYFITNQK                                                                                                                      | 2%  | 2/210 | <i>G. hirsutum</i>  | 60.90/5.17 | 33.60/9.60 | 2.43  |
| 2733 | gi 164281758 | pentatricopeptide repeat-containing protein    | 323 | 70/LDLYVAAAGINPQR;71/NPLYLGLQQHR;24/AQGR PMIDFPK;158/IVVAGAGSAGIGVVNAAR                                                                         | 13% | 4/210 | <i>G. hirsutum</i>  | 64.86/5.27 | 45.55/9.52 | 2.27  |

|      |              |                                                  |     |                                                                                                                                                                                    |     |       |                     |            |            |      |
|------|--------------|--------------------------------------------------|-----|------------------------------------------------------------------------------------------------------------------------------------------------------------------------------------|-----|-------|---------------------|------------|------------|------|
| 2756 | gi 109861556 | kh domain-containing protein                     | 47  | 25/ILDGPPGTQER;22/ALELIASHLR                                                                                                                                                       | 6%  | 2/110 | <i>G. hirsutum</i>  | 68.79/5.18 | 36.19/5.98 | 5.09 |
| 2764 | gi 48792870  | pyruvate kinase                                  | 127 | 20/EWHQMVIER;80/AEDGEIWTFSVR;27/ANLTFWR                                                                                                                                            | 9%  | 3/210 | <i>G. raimondii</i> | 65.01/5.10 | 30.70/4.84 | 0.41 |
| 3004 | gi 31407396  | glutathione s-transferase                        | 289 | 60/VFGYWASPYSYR;100/GVSYEYINEDIFGNK;52/HNPYLPQDPYDK;40/CFPTLWLAAWSAENER;37/VTNEACEYLK                                                                                              | 27% | 5/158 | <i>G. hirsutum</i>  | 26.41/5.33 | 27.55/7.78 | 0.29 |
| 3105 | gi 48797422  | aluminum-induced protein                         | 506 | 104/TANEGHIVIEAYR;39/DRGPYPPDQVVR;45/GPYPPDQVVR;91/ATFIAADADGSPFFWGTDAEGHLVLADDR;62/GCFFTSSGGLR;89/SYEHPLNELKPVPR                                                                  | 41% | 7/104 | <i>G. raimondii</i> | 31.27/5.34 | 23.99/7.07 | 5.11 |
| 3107 | gi 62295807  | cysteine-rich repeat secretory protein           | 234 | 25/GFGLGSIGQKPNQAYGLALCR;30/TCVVEAGSEIR;42/GAIIWYDNCLFK;79/TKELLSELANQAYSNP;30/LYGLTQCTR;26/VVGGSCNFR                                                                              | 35% | 6/203 | <i>G. hirsutum</i>  | 29.89/5.36 | 25.37/8.24 | 0.32 |
| 3108 | gi 48776883  | cathepsin b-like cysteine protease               | 262 | 42/LPTSFDAR;34/TAWPQCTSIGR;42/HYSVGAYR;112/NGPVEVSFTVYEDFAHYK;32/GWGDDGYFK                                                                                                         | 19% | 5/210 | <i>G. raimondii</i> | 34.42/5.36 | 31.37/5.98 | 0.32 |
| 3110 | gi 84172589  | ubiquinone biosynthesis protein                  | 253 | 107/KNPPAEYQGEQAR;36/NPPAEYQGEQAR;110/EVGISPSIVGSFPR                                                                                                                               | 17% | 3/210 | <i>G. hirsutum</i>  | 32.08/5.35 | 16.71/9.77 | 0.21 |
| 3123 | gi 11199964  | adenine nucleotide alpha hydrolases-like protein | 155 | 116/IGVAVDLSDESFAFAVR;39/QIEDEFDAFTASK                                                                                                                                             | 15% | 2/106 | <i>G. arboreum</i>  | 33.77/5.44 | 20.34/6.86 | 0.16 |
| 3124 | gi 73862760  | isopentenyl diphosphate isomerase                | 497 | 40/YELLQQR;68/VWTNTCCSHPLYR;87/ESELISENLGVR;94/WGEHELTYLLFIVR;115/DVNVHPNPDEVAEAK;50/LVVDNFLFK;44/WWDHVEK                                                                          | 31% | 7/158 | <i>G. hirsutum</i>  | 32.74/5.31 | 30.03/8.84 | 4.18 |
| 3211 | gi 164322600 | glutelin type-a                                  | 278 | 69/GFALPHYADCSK;46/FPFLEQVGLNVS;26/LVLETNATR;56/APWYASDPQVVYVVK;81/GSGEVQIVGL                                                                                                      | 15% | 5/120 | <i>G. hirsutum</i>  | 41.56/5.38 | 45.88/9.32 | 3.65 |
| 3303 | gi 78334230  | flavanone 3-hydroxylase                          | 794 | 78/TLQASVVRDEDERPK;77/EFFALPAEEKLR;75/KGGFIVSSHLQGEAVQDWR;116/GGFIVSSHLQGEAVQDWR;78/EIVTYFSYPLR;48/WPDKPEGWVEVTK;51/CPQDPLTLGLKR;187/HTDPGTITLLQDQVGGGLQATR;84/LSIATFQNPAPDATVYPLK | 38% | 9/210 | <i>G. hirsutum</i>  | 45.29/5.30 | 35.86/5.23 | 2.06 |
| 3326 | gi 48741498  | flavanone 3-hydroxylase                          | 706 | 47/TLQASVVR;73/TLQASVVRDEDERPK;100/VAYNQFSNDIPVISLAGIDDVDGKR;42/KGGFIVSSHLQGEAVQDWR;124/GGFIVSSHLQGEAVQDWR;63/EIVTYFSYPLK;82/WPDKPEGWIEVTK;176/HTDPGTITLLQDQ                       | 38% | 8/210 | <i>G. raimondii</i> | 45.18/5.42 | 30.98/5.45 | 0.48 |
| 3339 | gi 164295626 | glutamine synthetase                             | 226 | 11/IIAEYIWIGGSGMDLR;87/HKEHIAAYGEGNER;128/HETADINSFSWGVANR                                                                                                                         | 11% | 3/210 | <i>G. hirsutum</i>  | 44.90/5.33 | 46.45/8.54 | N    |
| 3725 | gi 13243658  | t-complex protein 1 subunit theta-like           | 52  | 52/NPANFDVDNVR                                                                                                                                                                     | 4%  | 1/158 | <i>G. arboreum</i>  | 61.73/5.40 | 30.22/7.40 | 0.44 |
| 3824 | gi 48778421  | xaa-pro aminopeptidase                           | 122 | 57/IGEDPSVDSWISDNLPR;67/NQPPAETNPVIVHPLFAGR                                                                                                                                        | 13% | 2/171 | <i>G. raimondii</i> | 72.75/5.42 | 30.87/5.25 | 0.48 |
| 3827 | gi 13244481  | xaa-pro aminopeptidase 2                         | 100 | 74/LTEVTASDKLEGFR;25/GHIALGNAR                                                                                                                                                     | 8%  | 2/155 | <i>G. arboreum</i>  | 72.01/5.32 | 28.49/9.25 | 0.45 |
| 4002 | gi 48744626  | 14-3-3 protein (14-3-3d)                         | 266 | 19/LAEQAER;62/FMETVVSSVVPDELTVVEER;87/FMETVVSSVVPDELTVVEER;98/SAQDIAVSELAPTHPIR;62/DSTLIMQLLR;45/DSTLIMQLLR                                                                        | 18% | 6/210 | <i>G. raimondii</i> | 26.51/5.43 | 32.41/5.01 | 0.39 |
| 4017 | gi 109829261 | ascorbate peroxidase                             | 624 | 71/LAWHSAGTFDVK;128/QPAELAHAANNGLDIAVR;81/EDKPHPPPEGR;84/LPNATEGADHLR;45/QVFSNQMGSLSDQDIVALSGGHTLGR;71/VLLSDPVFRPLVEK;144/YAADEDAFFADYTEAHLK                                       | 42% | 7/210 | <i>G. hirsutum</i>  | 28.59/5.61 | 28.61/5.07 | 0.23 |

|      |              |                                                         |     |                                                                                                                               |     |       |                      |            |            |      |
|------|--------------|---------------------------------------------------------|-----|-------------------------------------------------------------------------------------------------------------------------------|-----|-------|----------------------|------------|------------|------|
| 4104 | gi 48746857  | glutamine synthetase                                    | 58  | 8/IIAEYIWIGGSGMDLR;51/HKEHIAAYGEGNER                                                                                          | 9%  | 2/127 | <i>G. raimondii</i>  | 34.41/5.48 | 34.04/5.81 | N    |
| 4122 | gi 48751326  | ascorbate peroxidase                                    | 517 | 71/LAWHSAGTFDVK;153/QPAELAHAANNGLDIAVR<br>;74/EDKPHPPPEGR;83/VLLSDPVFRPLVDK;137/YAA<br>DEDAFFADYAEHLK                         | 25% | 5/210 | <i>G. raimondii</i>  | 29.34/5.60 | 31.77/6.82 | 0.49 |
| 4131 | gi 48799208  | alcohol<br>dehydrogenase-like                           | 241 | 52/SVASELCQTGVR;26/INCISPAPIPTPMVIR;59/QIAE<br>IYQGIPK;104/YVTGHNLVVDGGFTSFK                                                  | 22% | 4/210 | <i>G. raimondii</i>  | 30.98/5.51 | 27.63/6.42 | 0.14 |
| 4159 | gi 48802272  | type 2 ribosome-<br>inactivating protein<br>precursor   | 112 | 112/YANDYSGLVNVATCDGFVEER                                                                                                     | 9%  | 1/175 | <i>G. raimondii</i>  | 32.89/5.63 | 24.25/8.76 | 0.27 |
| 4203 | gi 48753495  | thiosulfate<br>sulfurtransferase                        | 249 | 41/VLDASWYMPDEQR;9/VWWMFR;66/VWVLDGGL<br>PR;49/VYQGQTAGPLTFQTK;49/THQHIDAR;36/FDGA                                            | 23% | 6/210 | <i>G. raimondii</i>  | 37.16/5.48 | 28.95/6.15 | 2.47 |
| 4208 | gi 48879364  | 2-oxoglutarate-<br>dependent                            | 80  | 18/GVQAEIDFPVIEFR;29/SFAQLMWPDGHPR;33/YM<br>APPPGEYER                                                                         | 14% | 3/158 | <i>G. raimondii</i>  | 41.60/5.50 | 30.85/5.34 | 2.62 |
| 4212 | gi 48745618  | nad-malate<br>dehydrogenase                             | 354 | 74/VAILGAAGGIGQPLALLIK;66/GVNVVVIPAGVPR;<br>49/DDLFNINANIVK;79/KLFGVTTLDVVR;60/LFGVTT<br>LDVVR;13/AGAGSATLSMAYAAAR;13/FVESSLR | 28% | 7/210 | <i>G. raimondii</i>  | 39.48/5.55 | 29.79/5.98 | 0.27 |
| 4252 | gi 48797418  | phenylcoumaran<br>benzylic ether<br>reductase -like     | 84  | 43/FLPSEFGTDPAR;41/TVYIRPPQNILSQR                                                                                             | 10% | 2/210 | <i>G. raimondii</i>  | 39.07/5.62 | 28.63/5.73 | 2.83 |
| 4333 | gi 48813830  | stearoyl-acyl-carrier<br>protein desaturase<br>(GbSSI2) | 349 | 19/YLYLCGR;74/ATFISHGNTAR;76/DYADIVEYLVD<br>R;51/LKELIGLSPEGR;67/EAQEFVCGLAPR;62/ESPSV<br>PFSWVSGR                            | 24% | 6/155 | <i>G. raimondii</i>  | 43.62/5.46 | 31.86/5.59 | 2.26 |
| 4422 | gi 13248670  | mitochondrial<br>elongation factor Tu                   | 144 | 144/ILDQGGAGDNVGLLLR                                                                                                          | 6%  | 1/149 | <i>G. arboreum</i>   | 48.02/5.59 | 26.81/9.17 | N    |
| 4432 | gi 164258867 | protein disulfide<br>isomerase                          | 483 | 69/YLKPNEADHIAPWVK;69/VVVADTFDDMVFK;9<br>8/LAPILEEVAVHYENDAK;96/LDATANDIMDPNFDV<br>R;43/GYPTVYFR;108/SADGNISAYEGER            | 19% | 6/210 | <i>G. hirsutum</i>   | 48.21/5.55 | 48.50/9.35 | --   |
| 4760 | gi 164339680 | pyruvate<br>decarboxylase                               | 109 | 26/LKQNNTAYENYHR;22/IFVPEGQPLK;38/VNVLFQ<br>HIQK;23/ELLEWGSR                                                                  | 10% | 4/210 | <i>G. hirsutum</i>   | 63.23/5.50 | 42.43/8.16 | 2.80 |
| 4803 | gi 164313765 | xaa-pro<br>aminopeptidase 2                             | 76  | 76/NQPPAETNPVIVHPLEFAGR                                                                                                       | 8%  | 1/210 | <i>G. hirsutum</i>   | 72.41/5.44 | 27.27/4.94 | ++   |
| 5003 | gi 315074094 | proteasome subunit<br>beta type-6                       | 390 | 30/TSTGMYVANR;71/ASDKITQLTDNVNVCVCR;102/SG<br>SAADSQIVSDYVR;56/YFLHQHTIQLGQPATVK;87/T<br>VVINSDGVTR;43/NFYPGDK                | 28% | 6/113 | <i>G. barbadense</i> | 25.25/5.66 | 29.32/8.46 | 0.38 |
| 5131 | gi 48797422  | aluminum-induced<br>protein                             | 358 | 93/TANEGIIVIEAYR;54/DRGPYPDQVVR;51/GPYPP<br>DQVVR;60/FAFIIYDSSSK;37/GCFFTSGGGLR;63/SYE<br>HPLNELKPVPR                         | 27% | 6/158 | <i>G. raimondii</i>  | 30.61/5.73 | 23.99/7.07 | 0.23 |
| 5132 | gi 164261388 | snf7-like protein                                       | 146 | 14/TRHQIEK;38/SQLQGVSLR;94/VAQAEATGNDDGG<br>IDSDLQAR                                                                          | 16% | 3/158 | <i>G. hirsutum</i>   | 35.40/5.72 | 25.60/5.10 | N    |
| 5141 | gi 13349950  | phosphomannomas<br>e al                                 | 145 | 133/KPGLIALFDVDGTLTAPR;12/GTFIEFR                                                                                             | 10% | 2/210 | <i>G. arboreum</i>   | 34.70/5.71 | 26.04/9.12 | 0.17 |
| 5148 | gi 78324615  | protein phosphatase                                     | 228 | 70/ANHPMEDYVFAEFK;13/LVIANVGDSR;30/QLSVD<br>HEPASER;72/GGFVSNFPGDVAR;24/VDGQLAVAR                                             | 18% | 6/210 | <i>G. hirsutum</i>   | 31.16/5.69 | 34.27/6.84 | 0.43 |
| 5159 | gi 21090394  | soluble inorganic<br>pyrophosphatase                    | 130 | 64/VLYSSVVYPHNYGFIPR;43/HYTDIKDLPPHR;23/F<br>FEDYKK                                                                           | 16% | 3/158 | <i>G. arboreum</i>   | 30.56/5.80 | 25.72/7.10 | N    |
| 5205 | gi 48791016  | 2-oxoglutarate-<br>dependent                            | 156 | 47/VREETFGLMK;35/VREETFGLMK;55/ELVEVPVER<br>;54/YMAPPPGEYER                                                                   | 9%  | 4/158 | <i>G. raimondii</i>  | 41.68/5.68 | 34.53/5.12 | 2.28 |
| 5242 | gi 11206427  | homoserine kinase                                       | 63  | 63/LGVDQLVLAGLESEAK                                                                                                           | 6%  | 1/210 | <i>G. arboreum</i>   | 39.33/5.84 | 26.44/9.30 | 6.61 |

|      |              |                                             |     |                                                                                                                     |     |       |                     |            |            |      |
|------|--------------|---------------------------------------------|-----|---------------------------------------------------------------------------------------------------------------------|-----|-------|---------------------|------------|------------|------|
| 5422 | gi 48749615  | fumarylacetoacetase                         | 274 | 83/LATAIGDYVVDLSEIAK;40/LLSSTEPTLR;10/NCG TIFR;25/GPQNAIPQNWFLPIAYHGR;72/ASSIVISGT NINRPR;46/GQGYPTGQSPPYFGPSLK     | 32% | 6/158 | <i>G. raimondii</i> | 47.02/5.77 | 29.97/6.40 | 0.46 |
| 5721 | gi 164262533 | acid beta-fructofuranosidase                | 51  | 10/TFYDQNK;41/VLVDHSIVESFAQGGR                                                                                      | 6%  | 2/210 | <i>G. hirsutum</i>  | 67.91/5.84 | 39.06/8.94 | 0.18 |
| 6007 | gi 78353154  | proteasome subunit beta type                | 229 | 55/VQFTEYIQK;56/NVALYQFR;48/ETGPSLFYIDYIA TLHK;14/GAFGYGSYFSLAMMDR;56/LVVAPPNFVIK                                   | 26% | 5/210 | <i>G. hirsutum</i>  | 24.39/5.87 | 25.81/7.14 | 9.52 |
| 6009 | gi 109891548 | gdsl esterase lipase                        | 388 | 33/GYSGYNTR;80/YAAFQHVPLDEYK;119/TLVLLITP PPIDEDGR;80/HPYVENPSGLPER;28/MQYTDWR;47/ADLPLIADIDHDDPLK                  | 29% | 6/210 | <i>G. hirsutum</i>  | 28.06/5.89 | 28.66/6.38 | 2.91 |
| 6034 | gi 109882527 | proteasome subunit beta type-1              | 216 | 20/TVFASASER;141/DIYTGDKLEIVVINADGIR                                                                                | 11% | 3/191 | <i>G. hirsutum</i>  | 27.17/6.07 | 28.46/5.72 | N    |
| 6105 | gi 164296478 | gdsl esterase lipase cprd49                 | 341 | 39/GYFGWNSR;22/RAIQVLDHVFVK;81/LIFLTSPPVN EER;54/YASEHFSHLVR;69/VVNLFTAFQQR;77/TTLN PSEWTFHR                        | 21% | 6/210 | <i>G. hirsutum</i>  | 29.14/5.86 | 35.65/6.28 | 3.58 |
| 6109 | gi 48747985  | 6-phosphogluconolactonase                   | 243 | 64/EKGSFTVVLSGGSLIK;32/GSFTVVLSGGSLIK;62/L AFDGFLSK;60/SNVLSVSTATGFVK;24/DSPKPPPER                                  | 18% | 5/210 | <i>G. raimondii</i> | 30.41/5.92 | 28.77/8.61 | 3.04 |
| 6110 | gi 78324276  | ascorbate peroxidase                        | 59  | 22/VDKPHPPPEGR;37/LPNATEGADHLR                                                                                      | 8%  | 2/116 | <i>G. hirsutum</i>  | 29.20/5.94 | 30.07/7.62 | 2.18 |
| 6314 | gi 5045873   | phosphoglycerate kinase                     | 308 | 146/VDLNVPLDDNFNITDDTR;48/MVAALPDGGVLL LENVR;114/LASLADLYVNDAFGTAHR                                                 | 26% | 3/210 | <i>G. hirsutum</i>  | 44.56/5.95 | 21.82/7.85 | 2.13 |
| 6348 | gi 109838718 | serine-threonine kinase receptor-associated | 369 | 60/GAVWSVCLDTNALR;91/VWDALTGDLVLSFEHK; 45/IYDLNRPDAPPR;32/FWDANHYGLVK;17/FVAGGE DMWVR;124/FSPGGESYASGEDGTIR         | 28% | 6/210 | <i>G. hirsutum</i>  | 40.39/6.02 | 32.29/8.48 | 2.37 |
| 6422 | gi 48743158  | gdp-d-mannose 3-epimerase                   | 186 | 65/SFTFIDECVEGVLR;59/KLPIHHPGPEGVR;62/VVG TQAPVQLGSLR                                                               | 18% | 3/210 | <i>G. raimondii</i> | 50.15/6.05 | 26.21/7.66 | 4.31 |
| 6425 | gi 48752415  | mitogen-activated protein kinase 4          | 152 | 38/YVHSANVLHR;114/LITELIGSPDDASLGFLR                                                                                | 9%  | 2/210 | <i>G. raimondii</i> | 47.42/6.09 | 35.57/7.24 | 2.51 |
| 6713 | gi 48801140  | malate oxidoreductase                       | 254 | 64/GILYPSIDSIR;62/HITAEVGASVLR;72/AAVAEEVA EGHGDVGPVK;56/EETVEYVFR                                                  | 24% | 4/210 | <i>G. raimondii</i> | 61.28/6.01 | 23.01/5.10 | 2.14 |
| 6832 | gi 13350369  | transketolase                               | 326 | 50/NGNTGYDEIR;33/NLGWPYEPFHVPEDVK;72/HVP QGAALAEWNAK;69/SITGELPAGWEK;102/ALPTY TPESPADATR                           | 30% | 5/158 | <i>G. arboreum</i>  | 71.50/6.05 | 25.21/7.94 | 0.37 |
| 7003 | gi 11202870  | manganese superoxide dismutase              | 198 | 74/HHQTYITNYNK;65/ALEQLHDAIQK;35/NVRPDYL K;24/YASEVYEK                                                              | 13% | 4/210 | <i>G. arboreum</i>  | 24.96/6.20 | 32.17/8.58 | 8.63 |
| 7061 | gi 164257288 | triosephosphate isomerase                   | 402 | 45/KFFVGGNWK;50/FFVGGNWK;51/SDFHVAAQNC WVR;58/ALLNESNEFVGDK;51/VIACIGETLEQR;37/V ATPAQAQEVHCELK;110/WLNQNVGADIAASVR | 22% | 7/158 | <i>G. hirsutum</i>  | 28.08/6.32 | 37.60/9.20 | 4.02 |
| 7204 | gi 48750761  | catechol o-methyltransferase                | 86  | 86/VIVVEAVVPVPEANAYLR                                                                                               | 10% | 1/210 | <i>G. raimondii</i> | 41.18/6.17 | 20.69/6.56 | 0.46 |
| 7205 | gi 62295617  | alkaloid o-methyltransferase related        | 135 | 37/IELDEAMLQGQAEIWR;55/IELDEAMLQGQAEIWR ;32/YLYSFADSMALK;48/AHGCEIWDLASR                                            | 19% | 4/158 | <i>G. hirsutum</i>  | 40.62/6.17 | 23.02/6.49 | 0.25 |
| 7209 | gi 48749963  | auxin-induced protein pcnt115-like          | 392 | 83/FGIDYTDGKR;84/LGVDCIDLYYQHR;119/YIGLSE ASASTIR;105/ELGIGIVAYSPLGR                                                | 19% | 4/210 | <i>G. raimondii</i> | 41.34/6.25 | 28.52/6.20 | N    |
| 7212 | gi 18099886  | auxin-induced protein pcnt115               | 244 | 78/YIGISEASPETIR;94/AKEDTSNSSLGVFPR;73/FQG ENLEQNR                                                                  | 13% | 3/210 | <i>G. arboreum</i>  | 40.87/6.29 | 30.87/6.50 | 0.33 |

|      |              |                                                        |     |                                                                                                                            |     |       |                     |            |            |      |
|------|--------------|--------------------------------------------------------|-----|----------------------------------------------------------------------------------------------------------------------------|-----|-------|---------------------|------------|------------|------|
| 7318 | gi 164257564 | beta galactosidase 9                                   | 235 | 26/TDNEPFKR;95/LPHRPVEDLAFAVAR;114/TSGGPF<br>YITSYDYDAPIDEYGLR                                                             | 10% | 3/210 | <i>G. hirsutum</i>  | 46.09/6.30 | 49.18/9.65 | 3.24 |
| 7408 | gi 48821513  | dihydrolipoyllysine-<br>residue<br>succinyltransferase | 112 | 48/EGETVEPGTR;11/LGFMSGFVK;53/ATVSALQHQP<br>IVNAVIDGDDIYR                                                                  | 16% | 3/206 | <i>G. raimondii</i> | 49.28/6.21 | 29.16/8.82 | 3.07 |
| 7503 | gi 78329865  | leucine                                                | 124 | 124/GNTAAAIVSGTVLGLYEDNR                                                                                                   | 7%  | 1/210 | <i>G. hirsutum</i>  | 55.04/6.12 | 26.87/8.27 | 3.27 |
| 7511 | gi 164358784 | succinate-<br>semialdehyde                             | 90  | 28/IGDALLASTQVR;63/AGLAAYIFTNNVQR                                                                                          | 9%  | 2/210 | <i>G. hirsutum</i>  | 55.93/6.20 | 30.40/8.66 | 2.85 |
| 7518 | gi 73864584  | 6-phosphogluconate<br>dehydrogenase                    | 67  | 35/GWNLNFGELAR;33/DLFGAHTYER                                                                                               | 8%  | 2/158 | <i>G. hirsutum</i>  | 56.12/6.25 | 27.19/9.37 | 2.30 |
| 7613 | gi 48780111  | gmp synthase                                           | 225 | 44/LHCVFVDNGLLR;23/LLFKDEV R;44/HPFPGPGLA<br>VR;114/VLGDVTEGNALDIVR                                                        | 15% | 4/210 | <i>G. raimondii</i> | 61.02/6.25 | 33.45/8.87 | 2.85 |
| 7715 | gi 48739022  | asparagine<br>synthetase                               | 204 | 24/ALHLYDCLR;48/ATSAWGLEAR;61/AFDDENHPY<br>LPK;25/EAYYYR;46/FFPQNSAR                                                       | 17% | 5/158 | <i>G. raimondii</i> | 63.21/6.28 | 29.28/6.48 | 0.45 |
| 7717 | gi 48812774  | glucose-6-phosphate<br>1-dehydrogenase                 | 58  | 58/NVQIIFSEDFGTEGR                                                                                                         | 5%  | 1/181 | <i>G. raimondii</i> | 61.25/6.29 | 33.06/7.94 | N    |
| 7720 | gi 164327830 | tcp-1 cpn60<br>chaperonin family                       | 366 | 40/HKFDVDTR;68/LVEGLVLDHGSR;107/SEINAGFFY<br>SNAEQR;51/GPNDHTIAQIK;100/NTIEDEAVILGAGAF                                     | 21% | 5/158 | <i>G. hirsutum</i>  | 61.82/6.34 | 35.31/5.74 | 0.32 |
| 7801 | gi 164312069 | transketolase                                          | 305 | 47/GLGWHVIWVK;85/NGNTGYDEIR;91/ANSYSVHG<br>SALGAK;83/ALPTYTPESPADATR                                                       | 11% | 4/158 | <i>G. hirsutum</i>  | 71.38/6.10 | 46.70/8.52 | 0.41 |
| 7820 | gi 48749600  | sucrose synthase                                       | 209 | 72/IQNLNALQHVL R;36/FQEIGLER;37/LLPDAVGTTC<br>GQR;64/VYGTEYS DILR                                                          | 16% | 4/210 | <i>G. raimondii</i> | 76.93/6.33 | 30.57/6.31 | 2.01 |
| 7822 | gi 48743676  | long chain acyl-CoA<br>synthetase 4                    | 381 | 85/DVYISYLPLAHIFDR;88/LLVEDIGELKPSIFCAVPR<br>;135/LILSGAAPLSTHVEEFLR;73/LESVPEMNYDALA                                      | 25% | 4/210 | <i>G. raimondii</i> | 70.50/6.34 | 30.84/8.13 | 0.18 |
| 7934 | gi 109863329 | 2-oxoglutarate e1<br>component                         | 133 | 133/LTDSFLDGTSSVYLEELQR                                                                                                    | 7%  | 1/210 | <i>G. hirsutum</i>  | 83.12/6.27 | 30.29/7.11 | 3.20 |
| 8001 | gi 13246902  | transmembrane<br>emp24 domain-<br>containing protein   | 392 | 83/ADSTWHNSHEGVDLVVK;43/GPTGDQIQDYRDK;<br>64/ISEKFEFVAHQK;48/FEFVAHQK;57/LEEALYNIQF<br>EQHWLEAQTER;96/AFYESAALIGASVLQVYLLR | 31% | 6/158 | <i>G. arboreum</i>  | 28.14/6.37 | 31.47/7.85 | 3.65 |
| 8003 | gi 21094593  | cysteine proteinase<br>inhibitor                       | 219 | 53/FAVDEHNKK;24/ENAMVEFVR;102/EIVHANA EVL<br>EDFAK;40/FKVEVHHK                                                             | 18% | 4/158 | <i>G. arboreum</i>  | 28.41/6.42 | 25.04/6.24 | 2.44 |
| 8118 | gi 164249213 | short chain alcohol<br>dehydrogenase                   | 242 | 53/VALITGGASGLGECSAR;69/LDIMFNNAGLIGDGE<br>VR;19/VTDASTDNFKR;30/VFDINVLGGFLGAK;13/ISI<br>GLPHAYK;58/SLAVELGEHGIR           | 19% | 6/177 | <i>G. hirsutum</i>  | 33.66/6.46 | 43.60/9.31 | 2.13 |
| 8129 | gi 164321379 | caffeoyl-o-<br>methyltransferase                       | 254 | 45/HQEVGHK;79/SLLQSDALYQYILETSVYPR;16/EPE<br>PMKELR;83/ENYELGLPVIR;30/DFVLELNK                                             | 19% | 5/210 | <i>G. hirsutum</i>  | 35.04/6.58 | 31.81/5.79 | 3.88 |
| 8213 | gi 32479439  | aldo keto                                              | 156 | 52/LDVDYIDLYYIIR;34/YIGISEASPETIR;26/DVEEII<br>PLCR                                                                        | 10% | 4/148 | <i>G. hirsutum</i>  | 41.75/6.57 | 42.01/8.05 | 2.68 |
| 8304 | gi 48739277  | poly -specific<br>endoribonuclease-b-                  | 154 | 23/LWQLDLNR;80/QEQAAFIEEISR;52/GGTSGSSSAF<br>EHV FVGEIK                                                                    | 16% | 3/210 | <i>G. raimondii</i> | 46.07/6.39 | 27.77/4.97 | 2.40 |
| 8314 | gi 3326420   | IAA-conjugate-<br>resistant 4                          | 114 | 114/FADINNA YEVLSDSEKR                                                                                                     | 7%  | 1/210 | <i>G. hirsutum</i>  | 45.81/6.47 | 43.69/7.16 | 2.64 |
| 8434 | gi 48745701  | hydroxymethylglutar<br>yl- synthase                    | 86  | 24/LVFNDFVR;62/LAPFSTLTGDESYQSR                                                                                            | 8%  | 2/158 | <i>G. raimondii</i> | 51.72/6.41 | 30.33/9.53 | 2.16 |
| 8523 | gi 5049652   | dihydrolipoyl<br>dehydrogenase                         | 278 | 78/DTLEVDAALIATGR;158/APFTNGLGLENNVVTQ<br>R;42/GFVPVDER                                                                    | 19% | 3/210 | <i>G. hirsutum</i>  | 55.75/6.51 | 22.74/6.66 | 0.20 |



|      |              |                                                           |     |                                                                                                          |     |       |                     |            |             |      |
|------|--------------|-----------------------------------------------------------|-----|----------------------------------------------------------------------------------------------------------|-----|-------|---------------------|------------|-------------|------|
| 8607 | gi 164270428 | adenylyl cyclase associated protein                       | 356 | 43/RSDFFNHLK;41/SAGDSLALAWIAYTGK;57/NKDQIHVEWAK;49/ELYLPGLR;72/SHYPLGPVWSASGK;62/KWAVENQIGR;34/WAVENQIGR | 16% | 7/210 | <i>G. hirsutum</i>  | 59.21/6.41 | 44.82/9.58  | 2.49 |
| 8712 | gi 164316346 | 2-hydroxyacyl- lyase                                      | 315 | 57/KAERPLIVFGK;106/GLVNDDHELAASAAR;104/FILVDVSEEEIKLR;49/DVVVFNFLTPMR                                    | 12% | 4/158 | <i>G. hirsutum</i>  | 61.54/6.48 | 46.68/10.08 | 3.24 |
| 8801 | gi 5049242   | transketolase 1                                           | 62  | 62/ALPTYTPESPADATR                                                                                       | 7%  | 1/210 | <i>G. hirsutum</i>  | 70.73/6.37 | 22.75/6.73  | 2.01 |
| 9201 | gi 48741079  | 26s proteasome non-atpase regulatory subunit 14           | 326 | 79/AVAVVVDPISVK;66/HYYSIAINYR;25/MLLNLIK;49/WTDGLTLR;26/RFDTHSK;81/TNEQTVQEMLNLAIK                       | 21% | 6/151 | <i>G. raimondii</i> | 37.11/6.64 | 30.95/7.31  | 0.47 |
| 9202 | gi 48750384  | malate dehydrogenase                                      | 163 | 36/ANTFVAEVMGLDPR;58/EIDYLTNR;70/CGVEEIYPLGPLNEYER                                                       | 14% | 3/158 | <i>G. raimondii</i> | 38.13/6.64 | 29.76/8.74  | 2.01 |
| 9404 | gi 48745701  | hydroxymethylglutaryl- synthase                           | 176 | 39/LVFNDFVR;119/LAPFSTLTGDESYQSR;17/SRHEFAPEK                                                            | 12% | 3/210 | <i>G. raimondii</i> | 51.64/6.63 | 30.33/9.53  | 2.14 |
| 9407 | gi 48828974  | isocitrate dehydrogenase                                  | 335 | 36/LVPGWTKPICIGR;62/HAFGDQYR;66/SKYEAAGIWYEHR;63/YEAAGIWYEHR;108/GGETSTNSIASIFAFPENQLLQR;26/LFTPSLAQR    | 17% | 5/210 | <i>G. raimondii</i> | 48.99/6.73 | 32.47/8.19  | 0.50 |
| 9418 | gi 13246368  | transcription factor                                      | 82  | 82/SVSINEFLKPAEGER                                                                                       | 8%  | 1/210 | <i>G. arboreum</i>  | 51.21/6.68 | 20.46/8.89  | --   |
| 9503 | gi 48816177  | monodehydroascorbate reductase                            | 312 | 131/EFVIVGGGNAAGYAAR;29/EAYAPYERPALK;39/LPGFHTCVGSGGER;42/IGGNLPGVHYIR;45/LDTSIIFPENQLLQR;26/LFTPSLAQR   | 28% | 6/210 | <i>G. raimondii</i> | 53.78/6.61 | 30.16/9.14  | 2.11 |
| 9606 | gi 48804741  | aldehyde dehydrogenase family 2 member mitochondrial-like | 308 | 96/TLVHESVYDEFVEK;51/DEIFGPVQSISK;74/FKDL EEVVQR;87/ANASSYGLAAGVFTQNIETANTLTR                            | 23% | 4/210 | <i>G. raimondii</i> | 57.18/6.66 | 29.48/6.99  | 5.27 |
| 9615 | gi 48810466  | methylmalonate-semialdehyde dehydrogenase                 | 228 | 54/AISFVGSNTAGMHIYGR;16/AISFVGSNTAGMHIYGR;92/DATLNALLAAGFGAAGQR;82/ADSLEDALNIVNR                         | 18% | 4/210 | <i>G. raimondii</i> | 56.70/6.85 | 26.96/9.16  | 2.19 |

<sup>a</sup> Sample spot protein number.

<sup>b</sup> NCBI gi number.

<sup>c</sup> Score for matched peptides.

<sup>d</sup> Sequence of matched peptides.

<sup>e</sup> Count of the number of distinct peptide sequences assigned to each protein.

<sup>f</sup> Number of unique peptides identified.

<sup>g</sup> Molecular mass.

<sup>h</sup> Average fold change of  $\geq 2$  or  $\leq 0.5$  and  $P \leq 0.05$ , as assessed by a Student *t*-test of three biological replicates. (" $\geq 2$ " means up-regulated; " $\leq 0.5$ " means down-regulated; "N" means other regulatory patterns. "++" means no detection in infection samples, while "--" means no detection in Mock sample.)

## Information of single-peptide-based protein identifications

ssp No.: 12

sequence identified: **AAQDIALTDLAPTHPIR**

the precursor m/z and charge observed: **1802.9431**

score/E-value for this peptide: **115/5.1e-009**

Annotated MS/MS spectra:

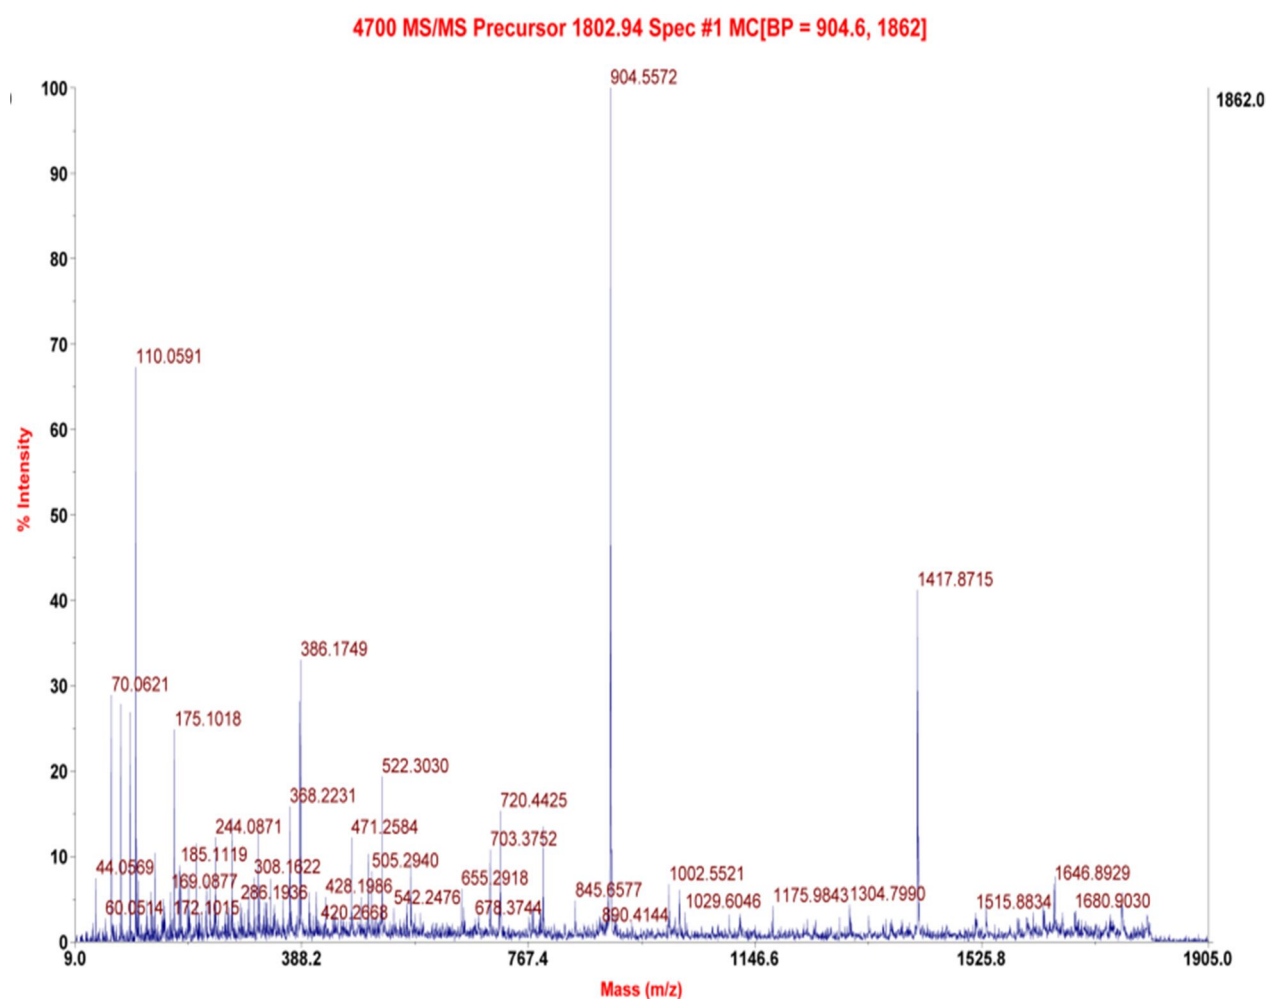

ssp No.: 123

sequence identified: **EQQVYLAR**

the precursor m/z and charge observed: **1006.5546**

score/E-value for this peptide: **49/0.038**

Annotated MS/MS spectra:

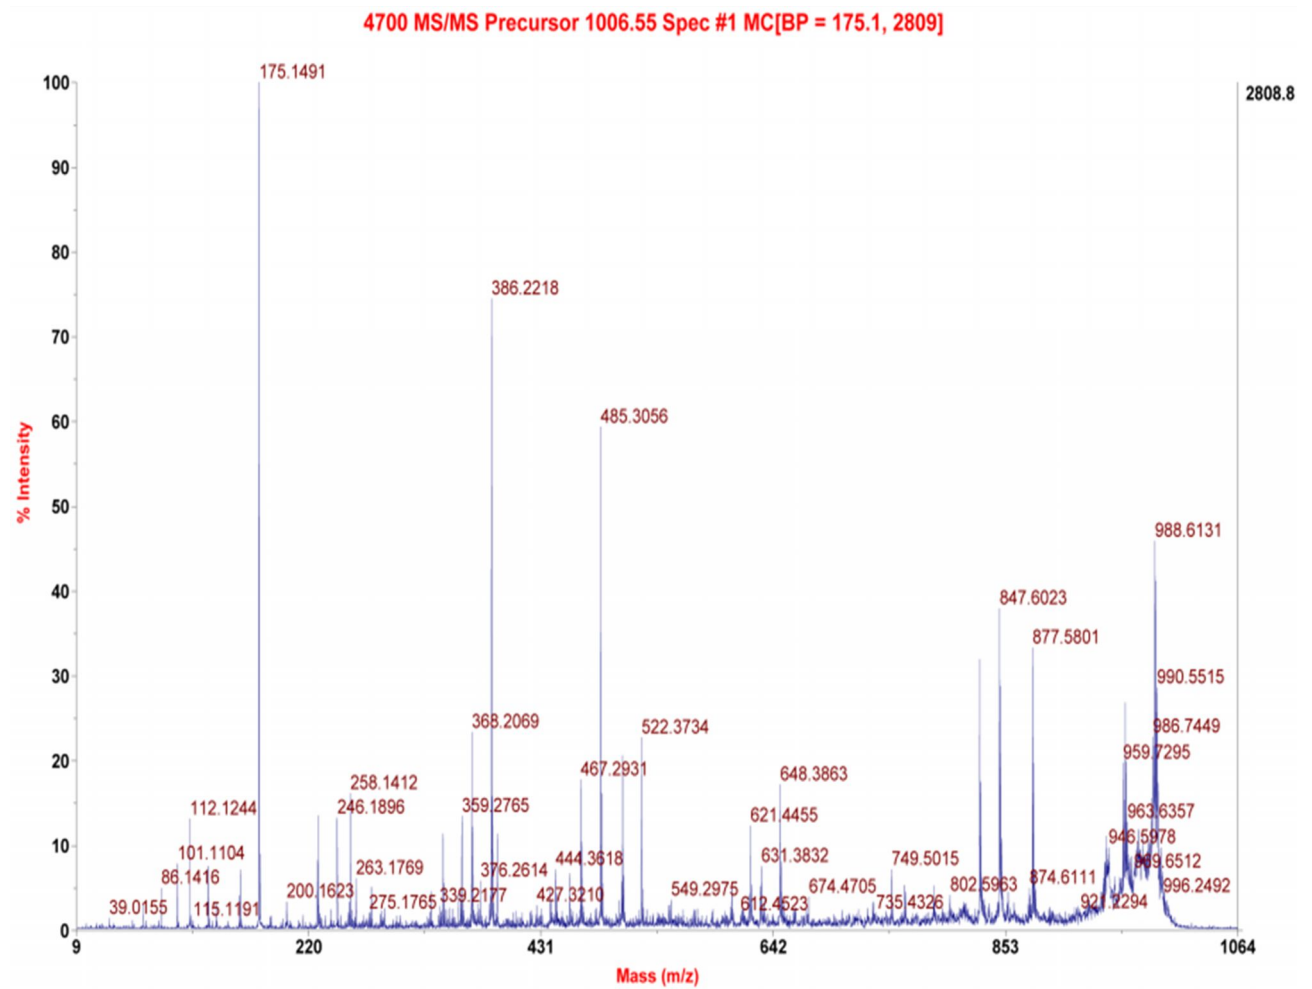

ssp No.: 233

sequence identified: SAQDIANAELAPTHPIR

the precursor m/z and charge observed: 1803.9147

score/E-value for this peptide: 59/0.002

Annotated MS/MS spectra:

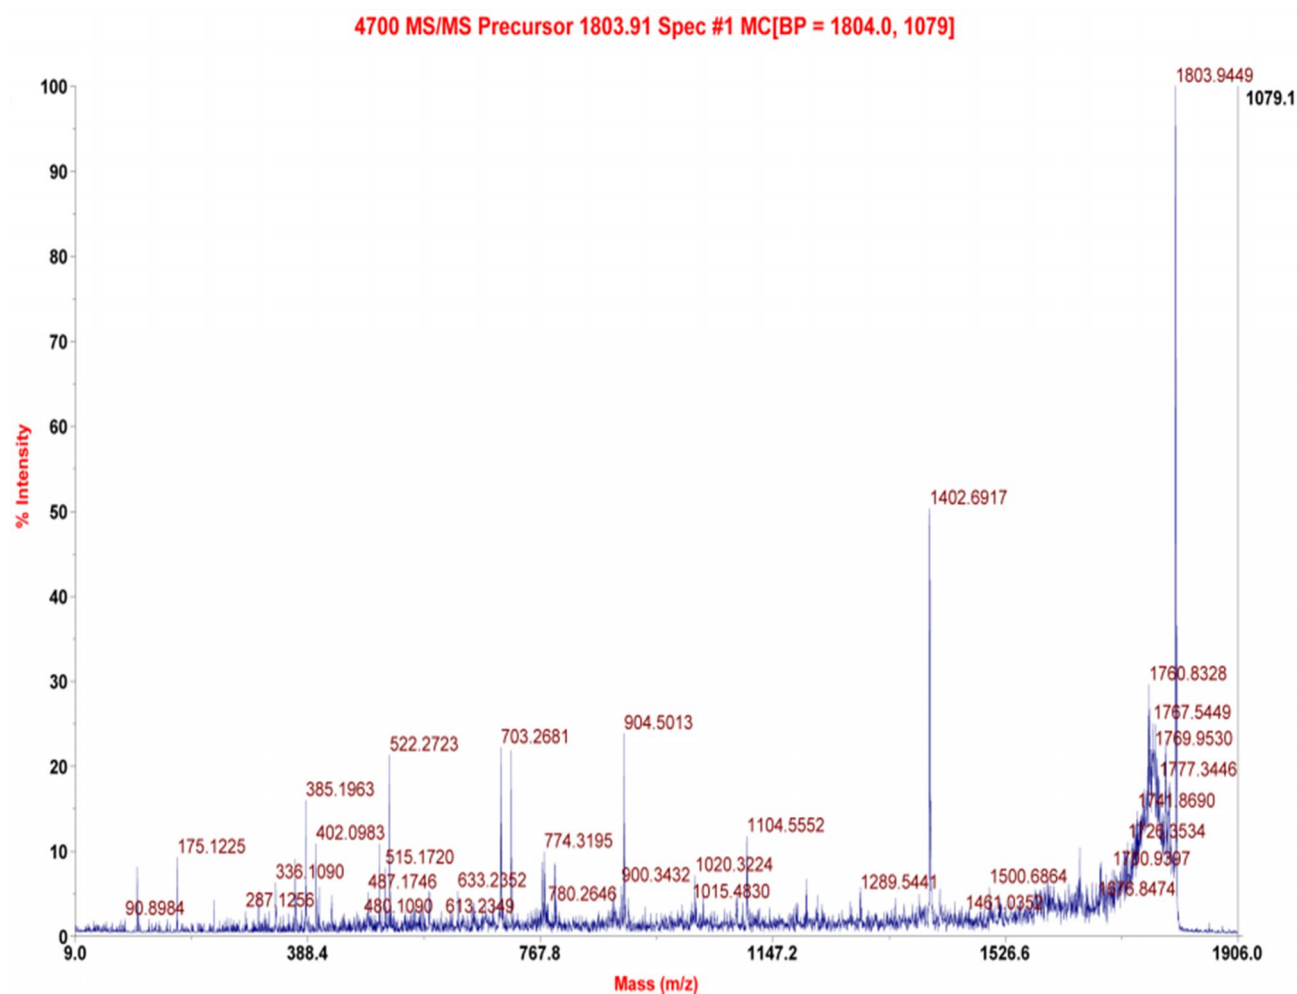

ssp No.: 424

sequence identified: AFYAVSALIR

the precursor m/z and charge observed: 1110.6155

score/E-value for this peptide: 53/0.013

Annotated MS/MS spectra:

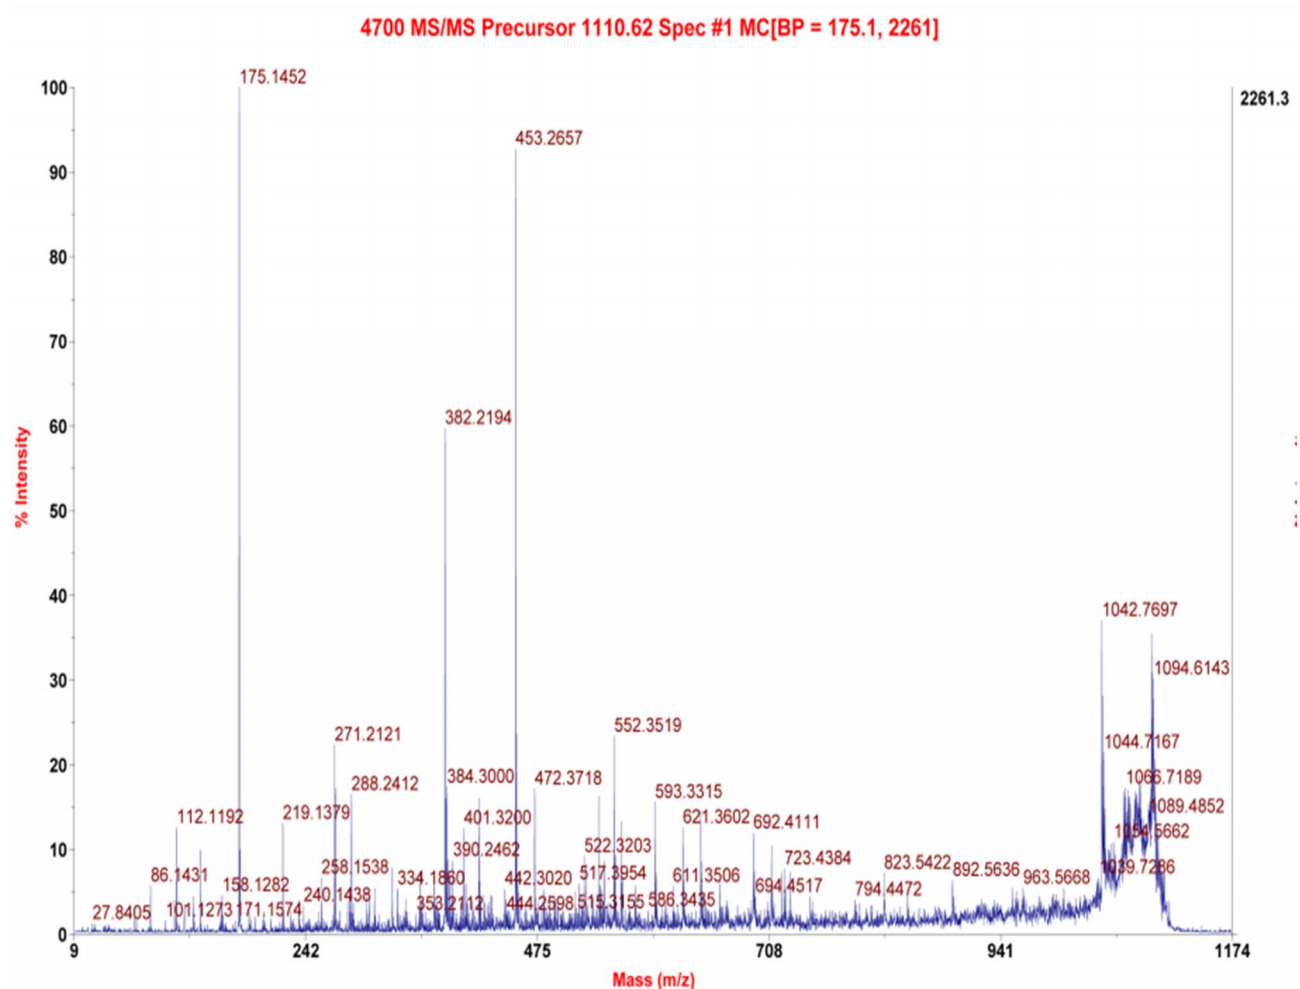

ssp No.: 524

sequence identified: SDQNLFSTEGADTIEIVNR

the precursor m/z and charge observed: 2109.0349

score/E-value for this peptide: 170/1.1e-014

Annotated MS/MS spectra:

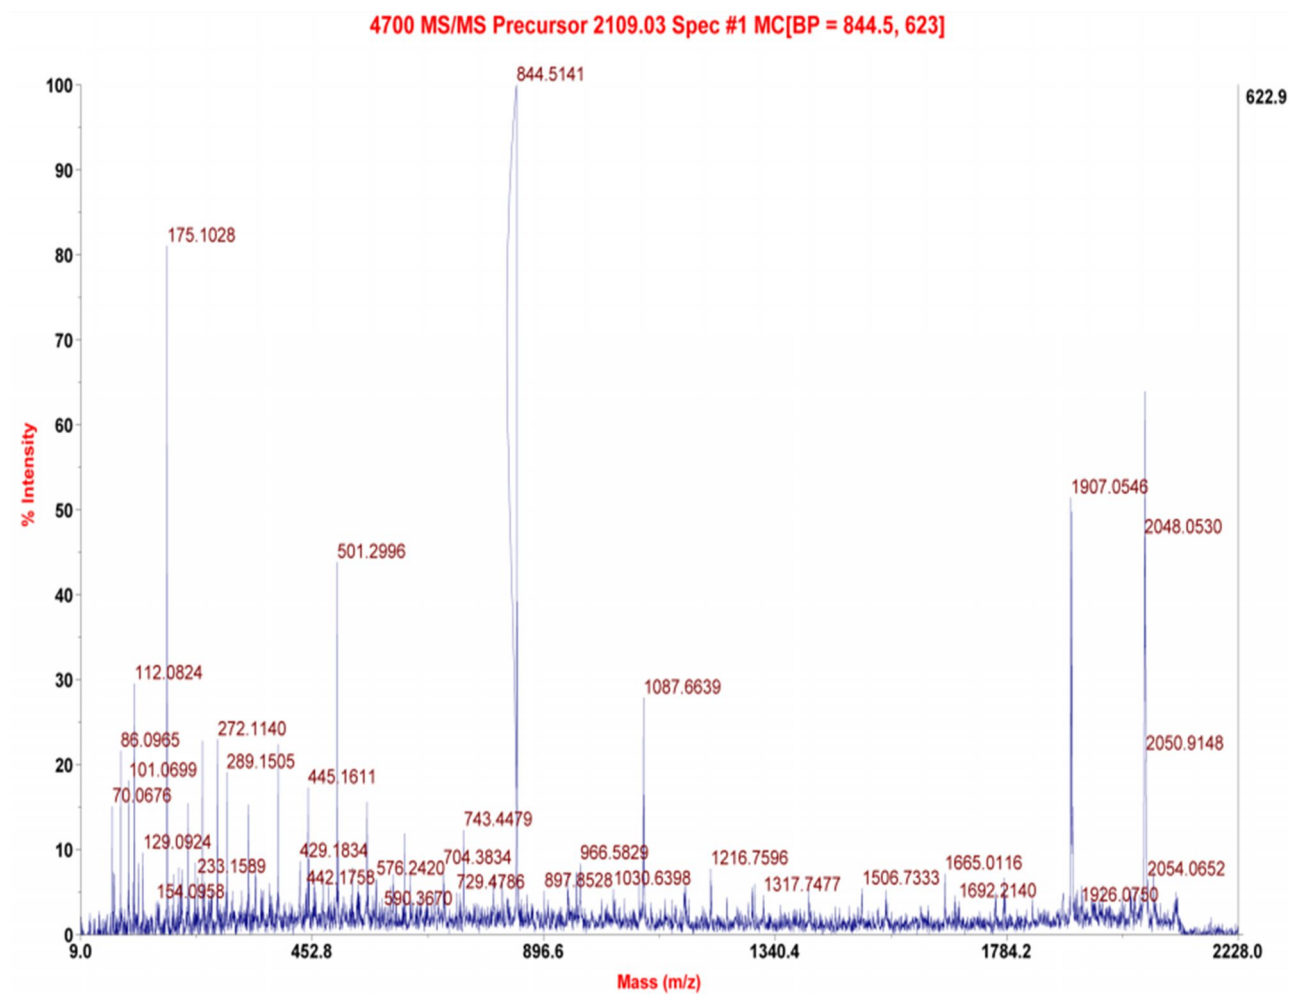

ssp No.: 1150

sequence identified: **LEGLFNELGCEAK**

the precursor m/z and charge observed: **1479.7294**

score/E-value for this peptide: **43/0.099**

Annotated MS/MS spectra:

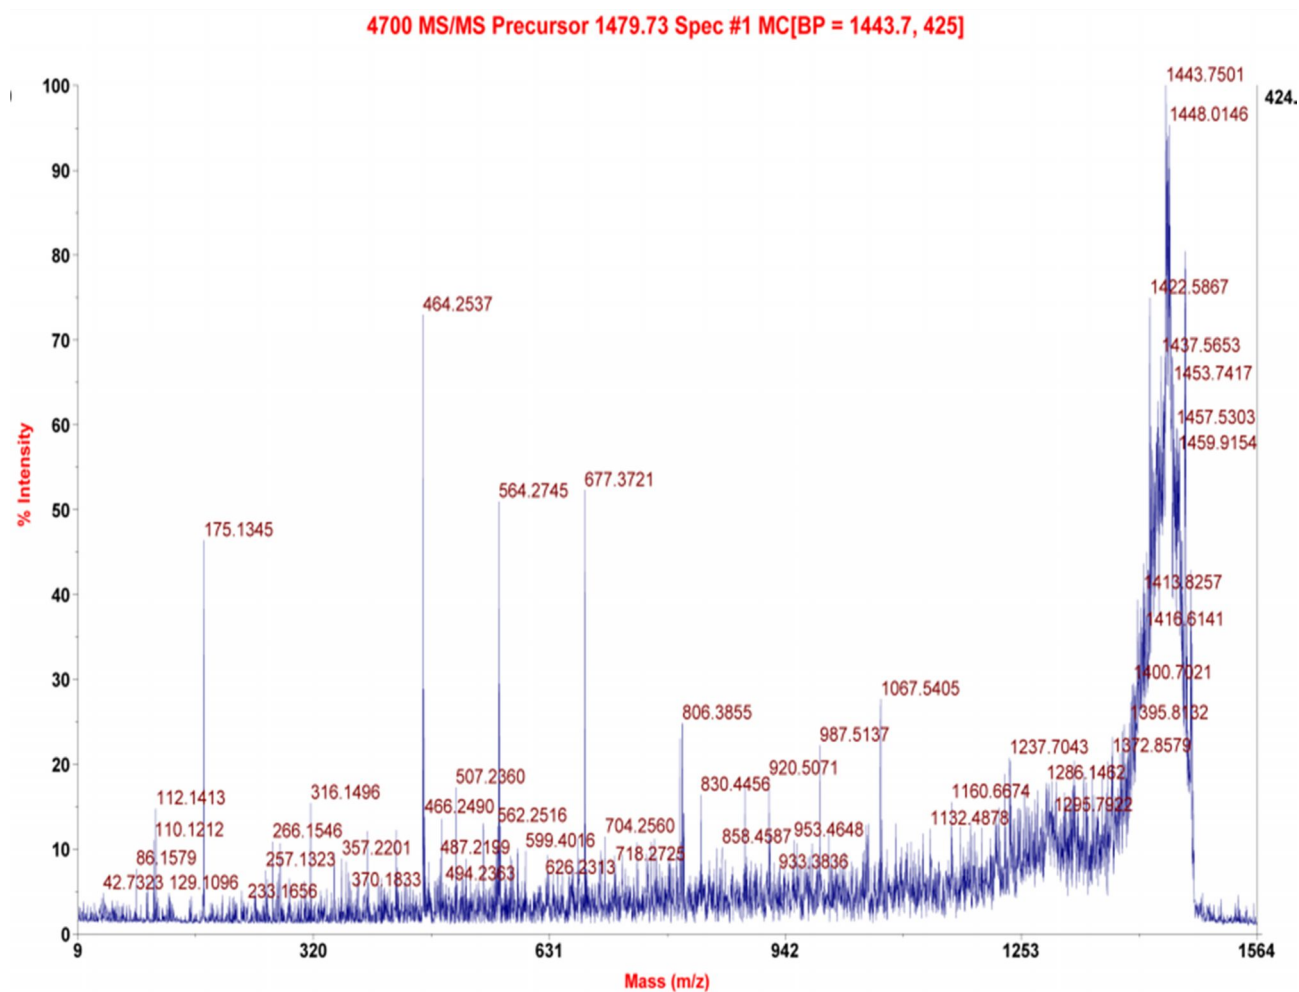

ssp No.: 2250

sequence identified: **SLNIEVEDLGITSYYNIGAEVGR**

the precursor m/z and charge observed: **2512.2803**

score/E-value for this peptide: **66/0.00022**

Annotated MS/MS spectra:

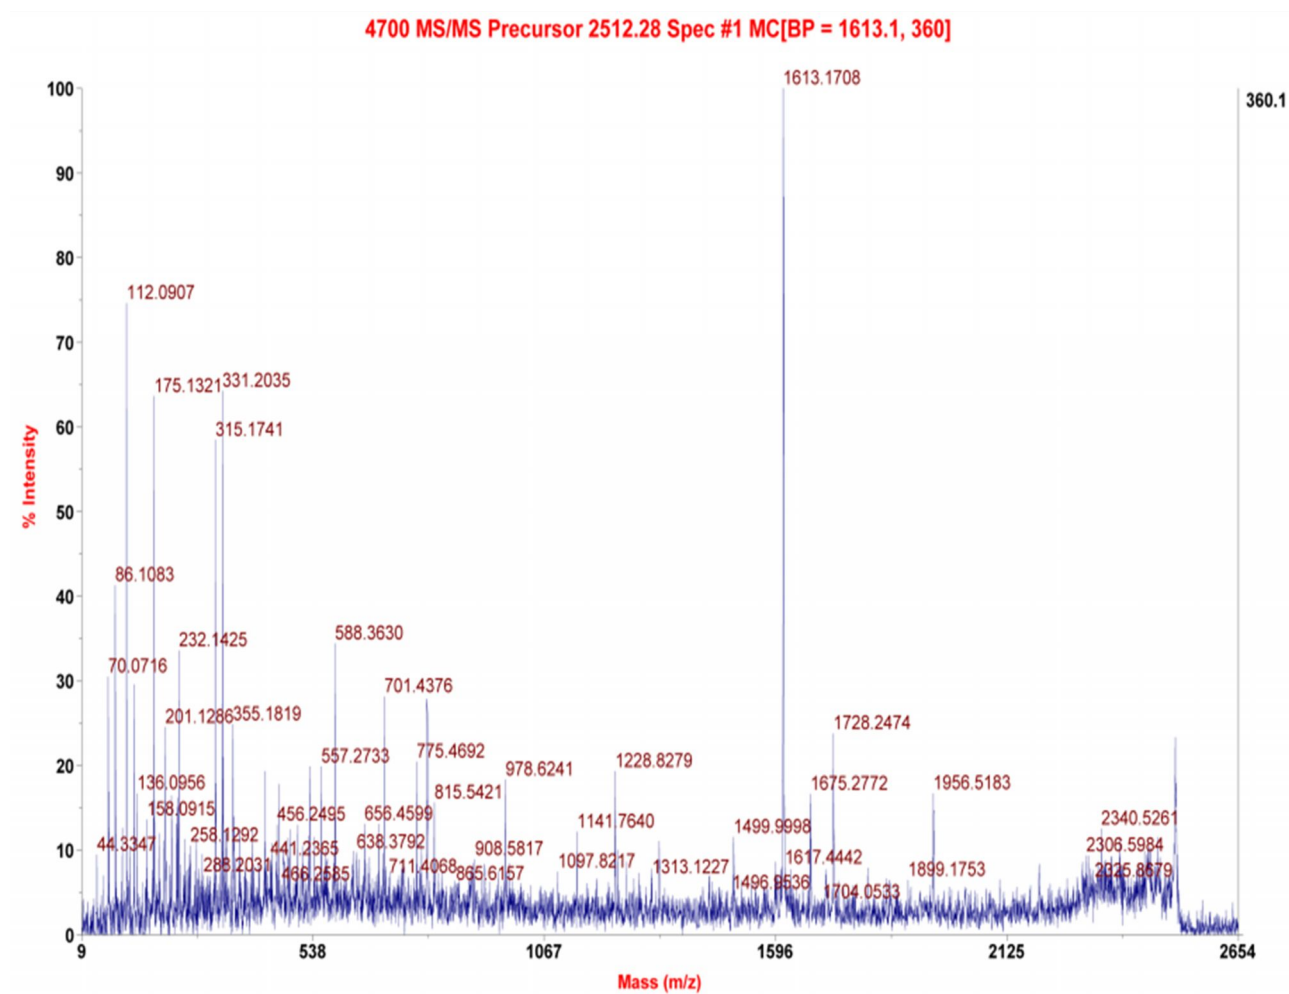



ssp No.: 2611

sequence identified: QIDELSTFSDTPAPSVTR

the precursor m/z and charge observed: 1963.9510

score/E-value for this peptide: 64/0.00054

Annotated MS/MS spectra:

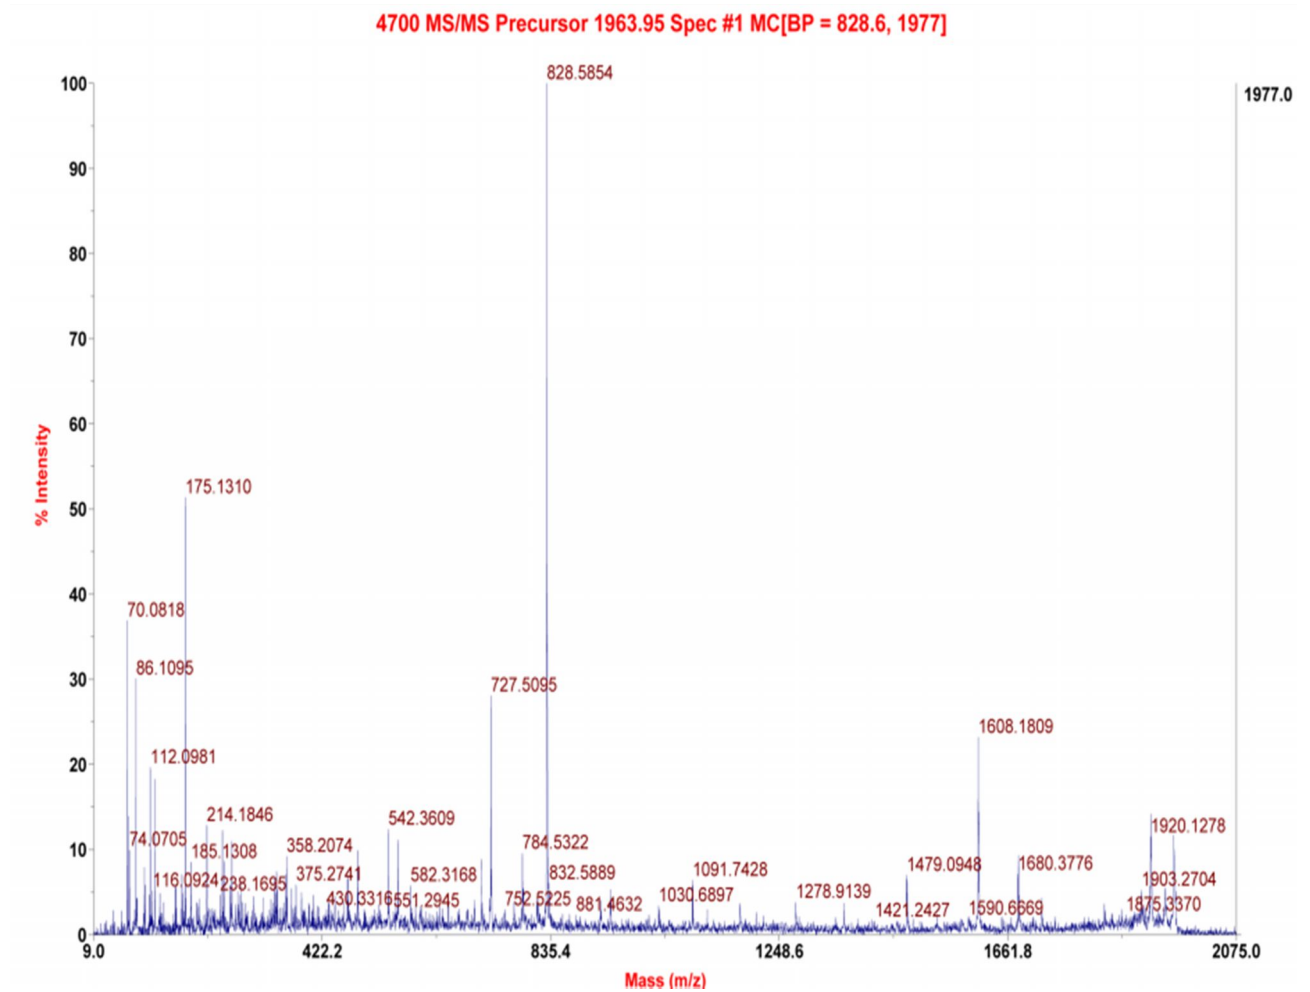

ssp No.: 3725

sequence identified: NPANFDVDNVR

the precursor m/z and charge observed: 1260.5808

score/E-value for this peptide: 52/0.016

Annotated MS/MS spectra:

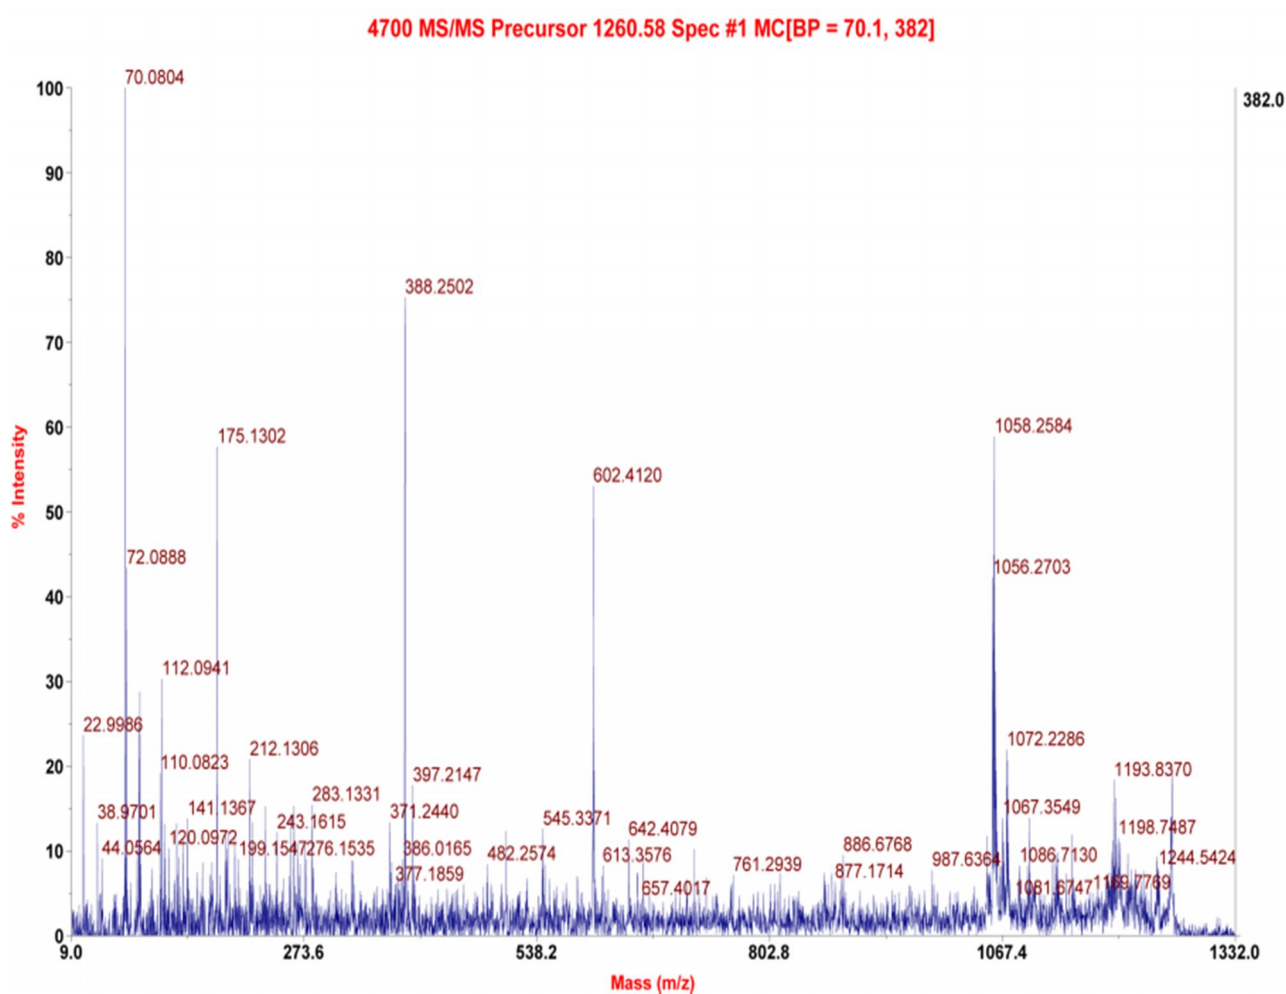

ssp No.: 4159

sequence identified: YANDYSLVNVATCDGFVEER

the precursor m/z and charge observed: 2379.0769

score/E-value for this peptide: 112/4.6e-009

Annotated MS/MS spectra:

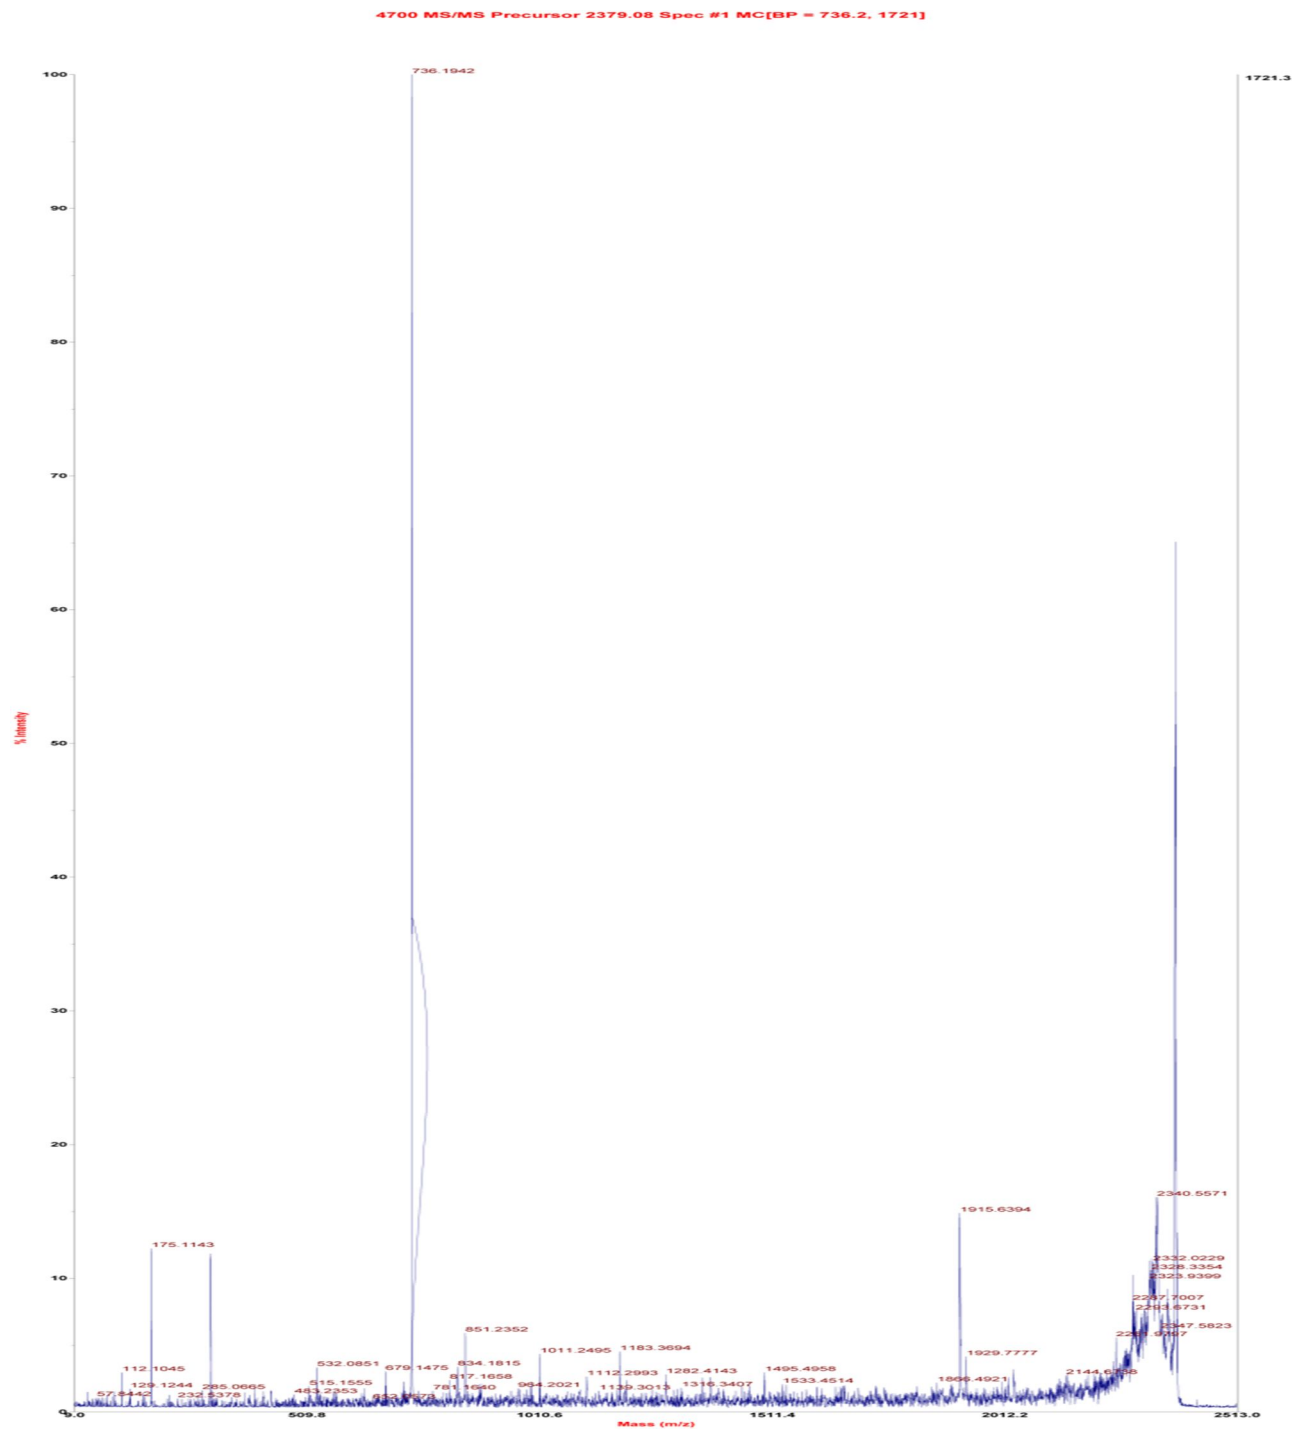

ssp No.: 4422

sequence identified: **ILDQQAGDNVGLLR**

the precursor m/z and charge observed: **1681.8540**

score/E-value for this peptide: **144/7.4e-012**

Annotated MS/MS spectra:

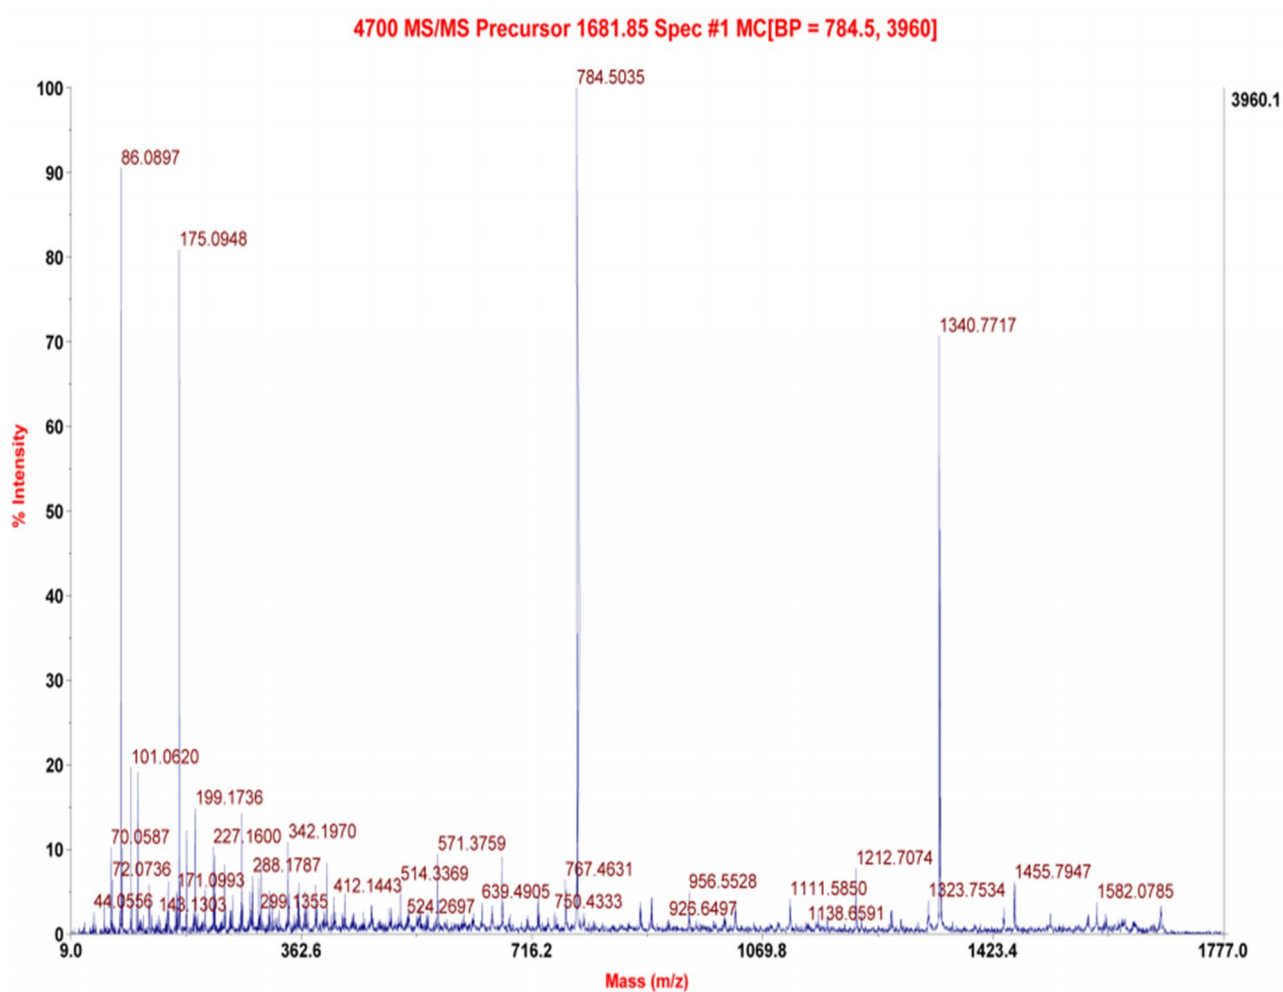

ssp No.: **4803**

sequence identified: **NQPPAETNPVIVHPLEFAGR**

the precursor m/z and charge observed: **2186.0879**

score/E-value for this peptide: **76/3e-005**

Annotated MS/MS spectra:

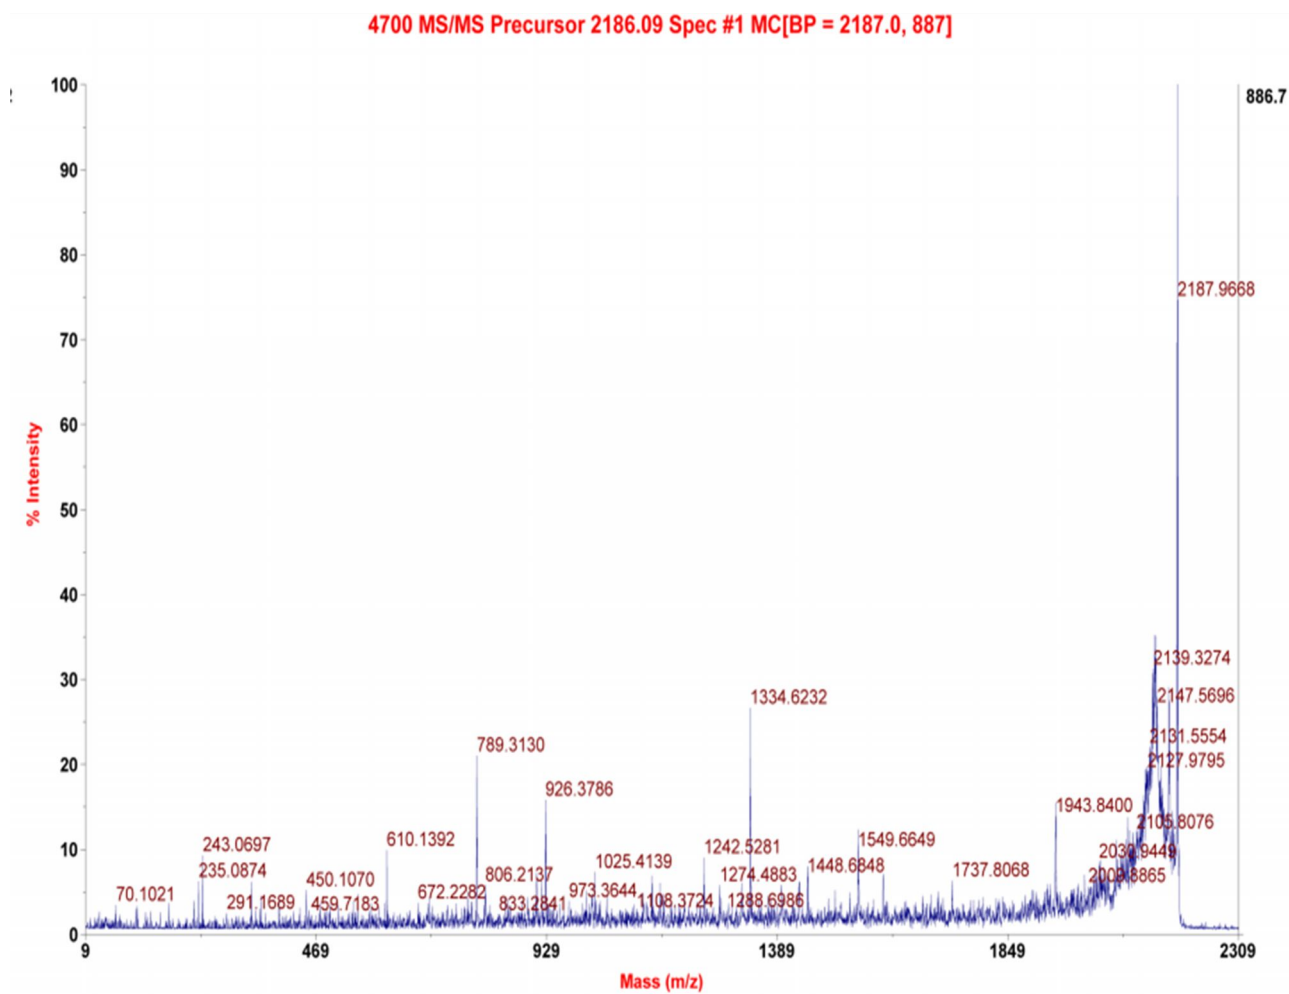

ssp No.: 5242

sequence identified: LGVDQLVLAGLESEAK

the precursor m/z and charge observed: 1641.8945

score/E-value for this peptide: 63/0.00095

Annotated MS/MS spectra:

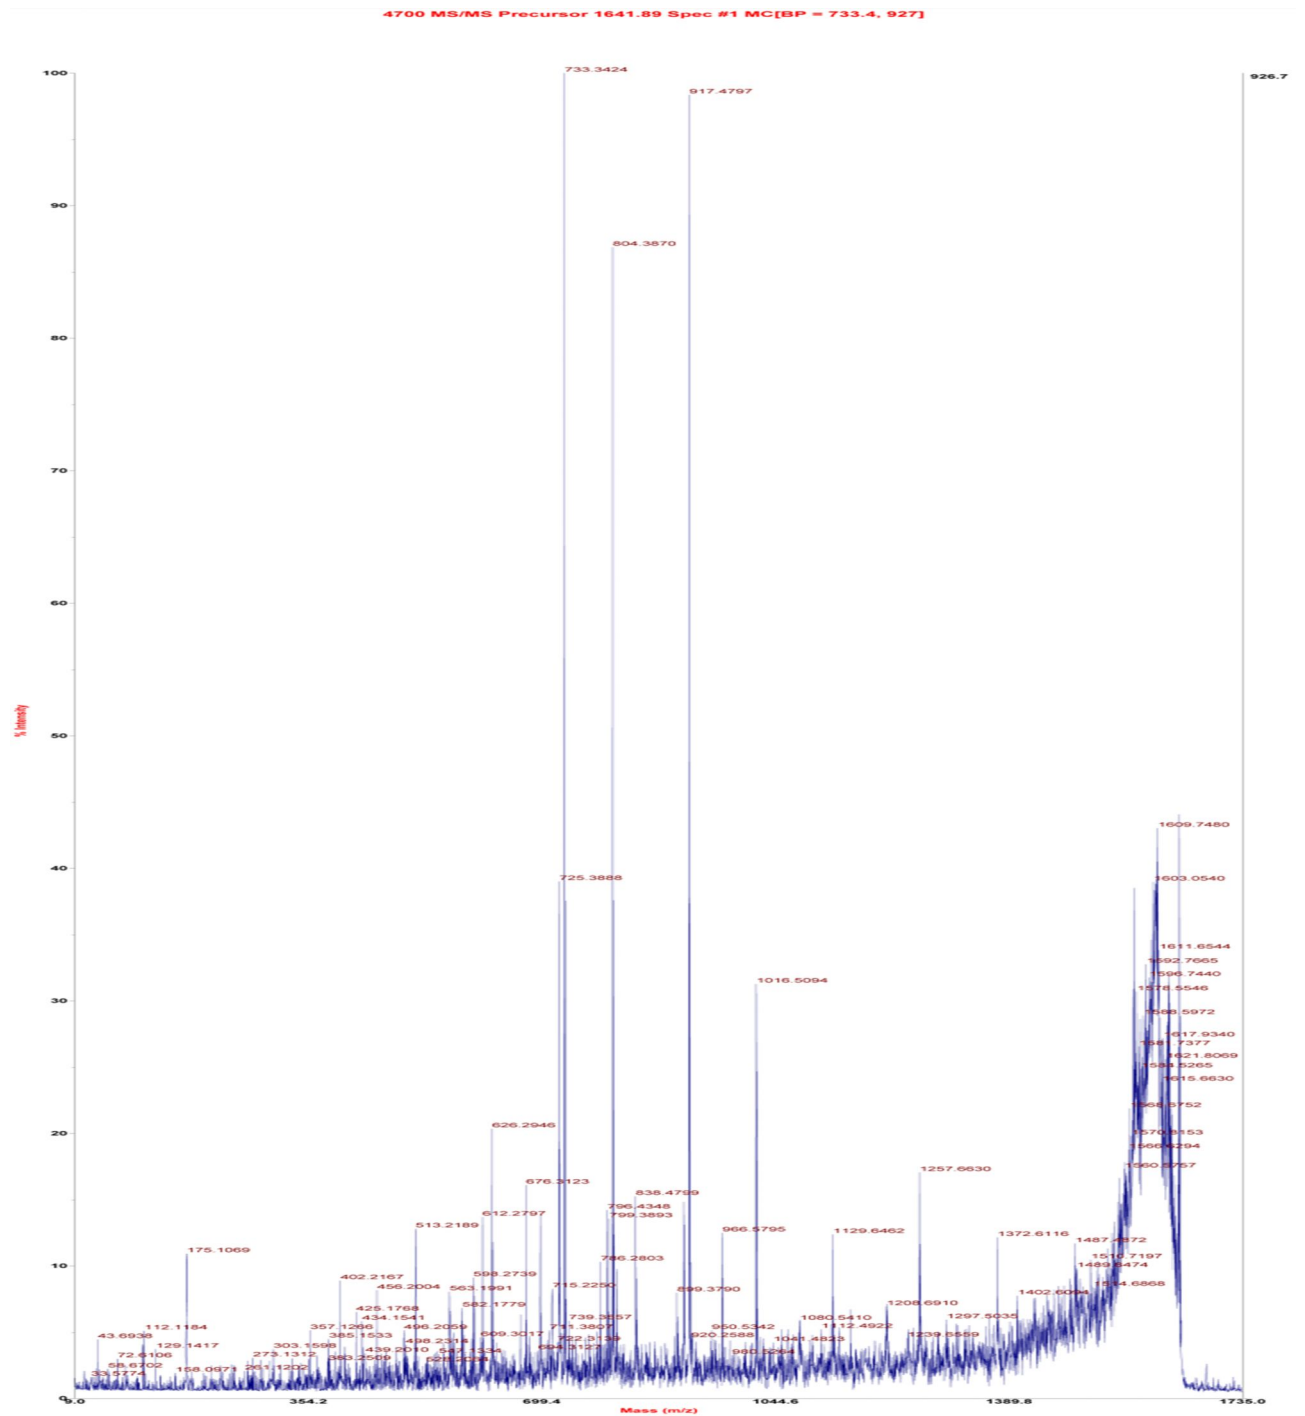

ssp No.: 7204

sequence identified: VIVVEAVVPVPEANAYLR

the precursor m/z and charge observed: 2037.1680

score/E-value for this peptide: 86/2.2e-006

Annotated MS/MS spectra:

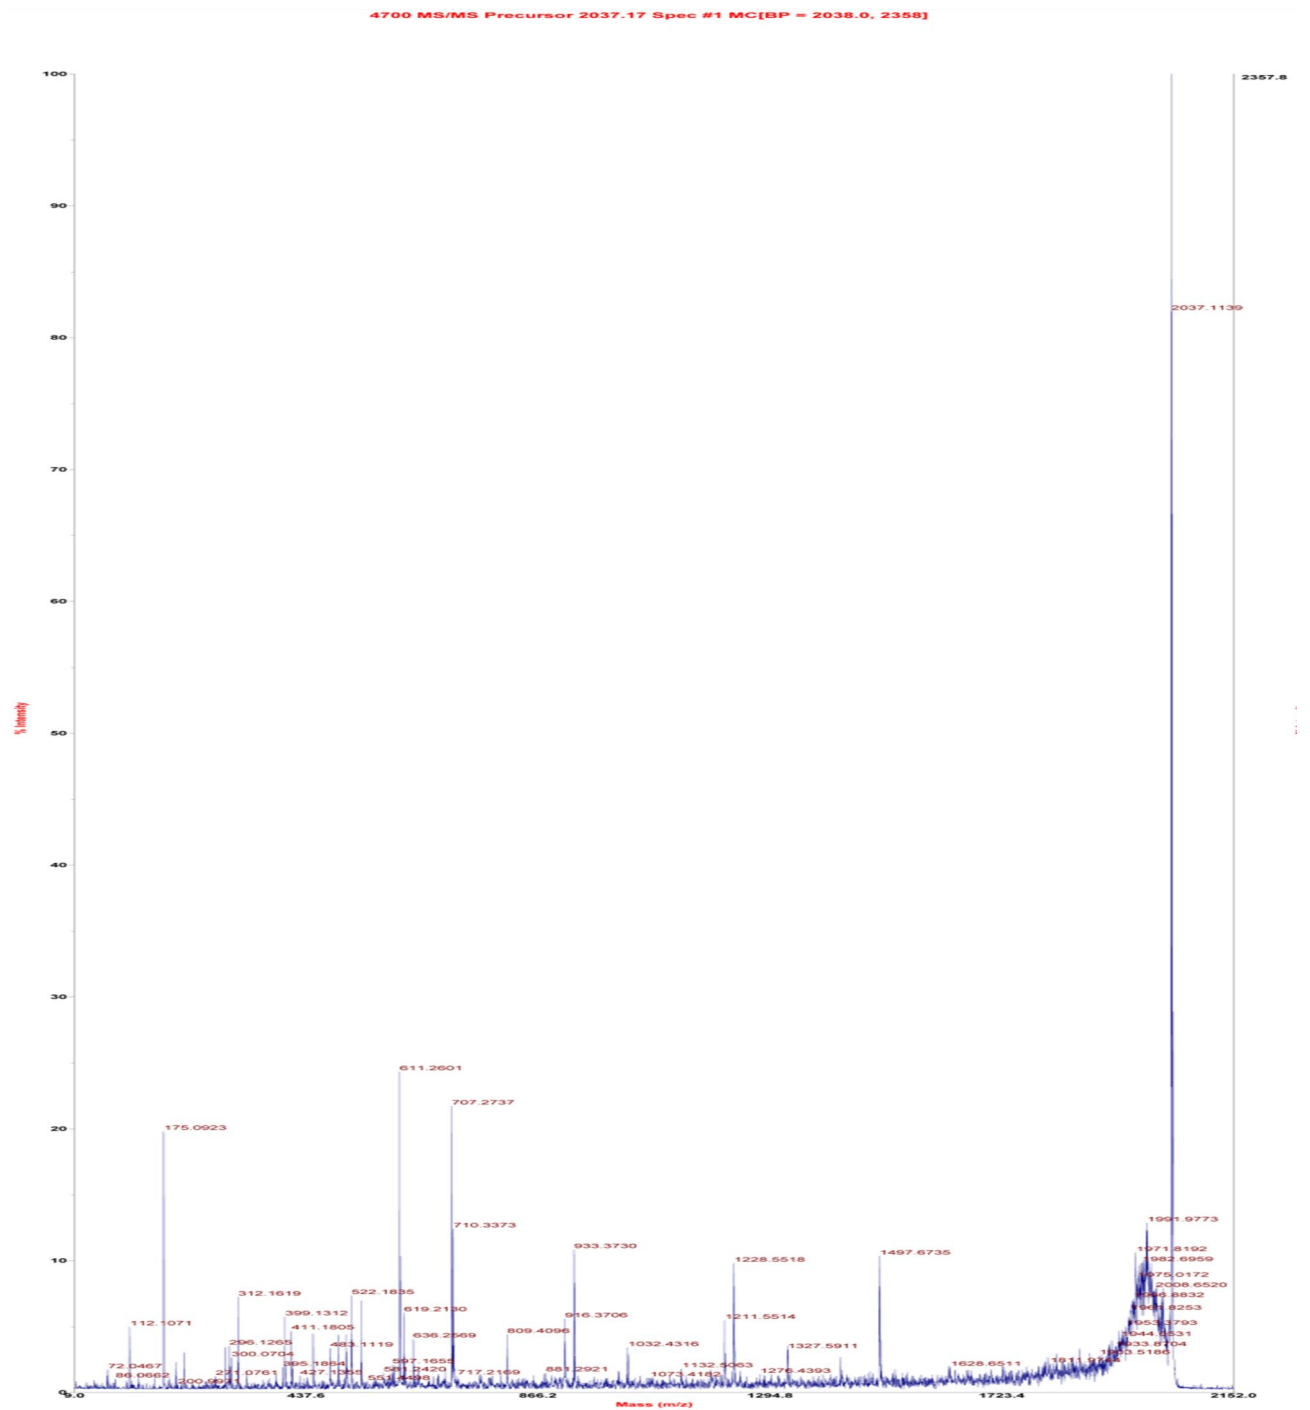

ssp No.: **7503**

sequence identified: **GNTAAAIVSGTVLGLYEDNR**

the precursor m/z and charge observed: **2021.0631**

score/E-value for this peptide: **124/5.4e-010**

Annotated MS/MS spectra:

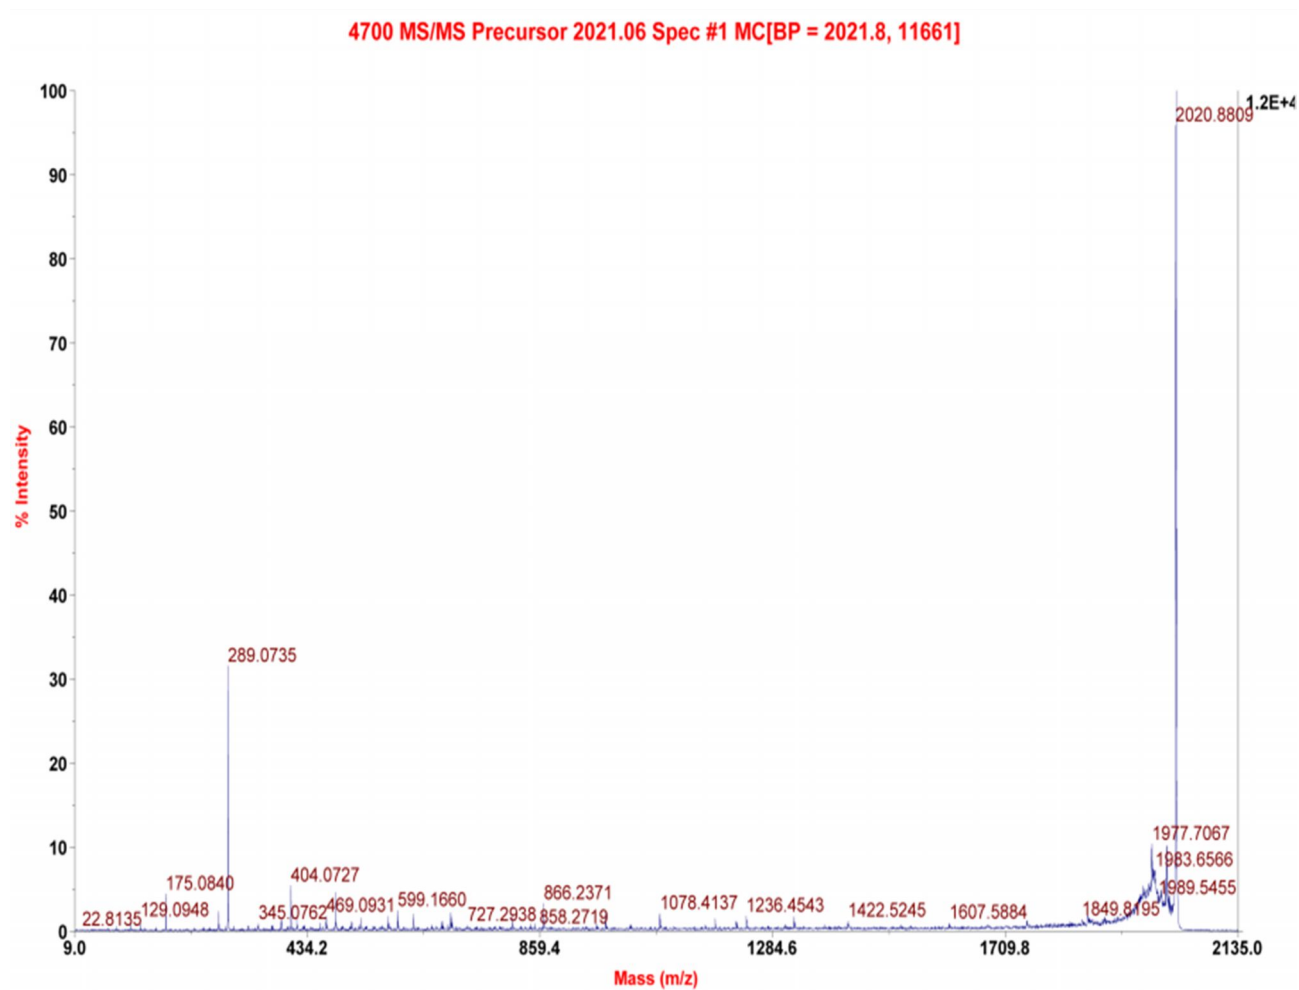



ssp No.: 7717

sequence identified: NVQIFSEDFGTEGR

the precursor m/z and charge observed: 1711.8552

score/E-value for this peptide: 58/0.0028

Annotated MS/MS spectra:

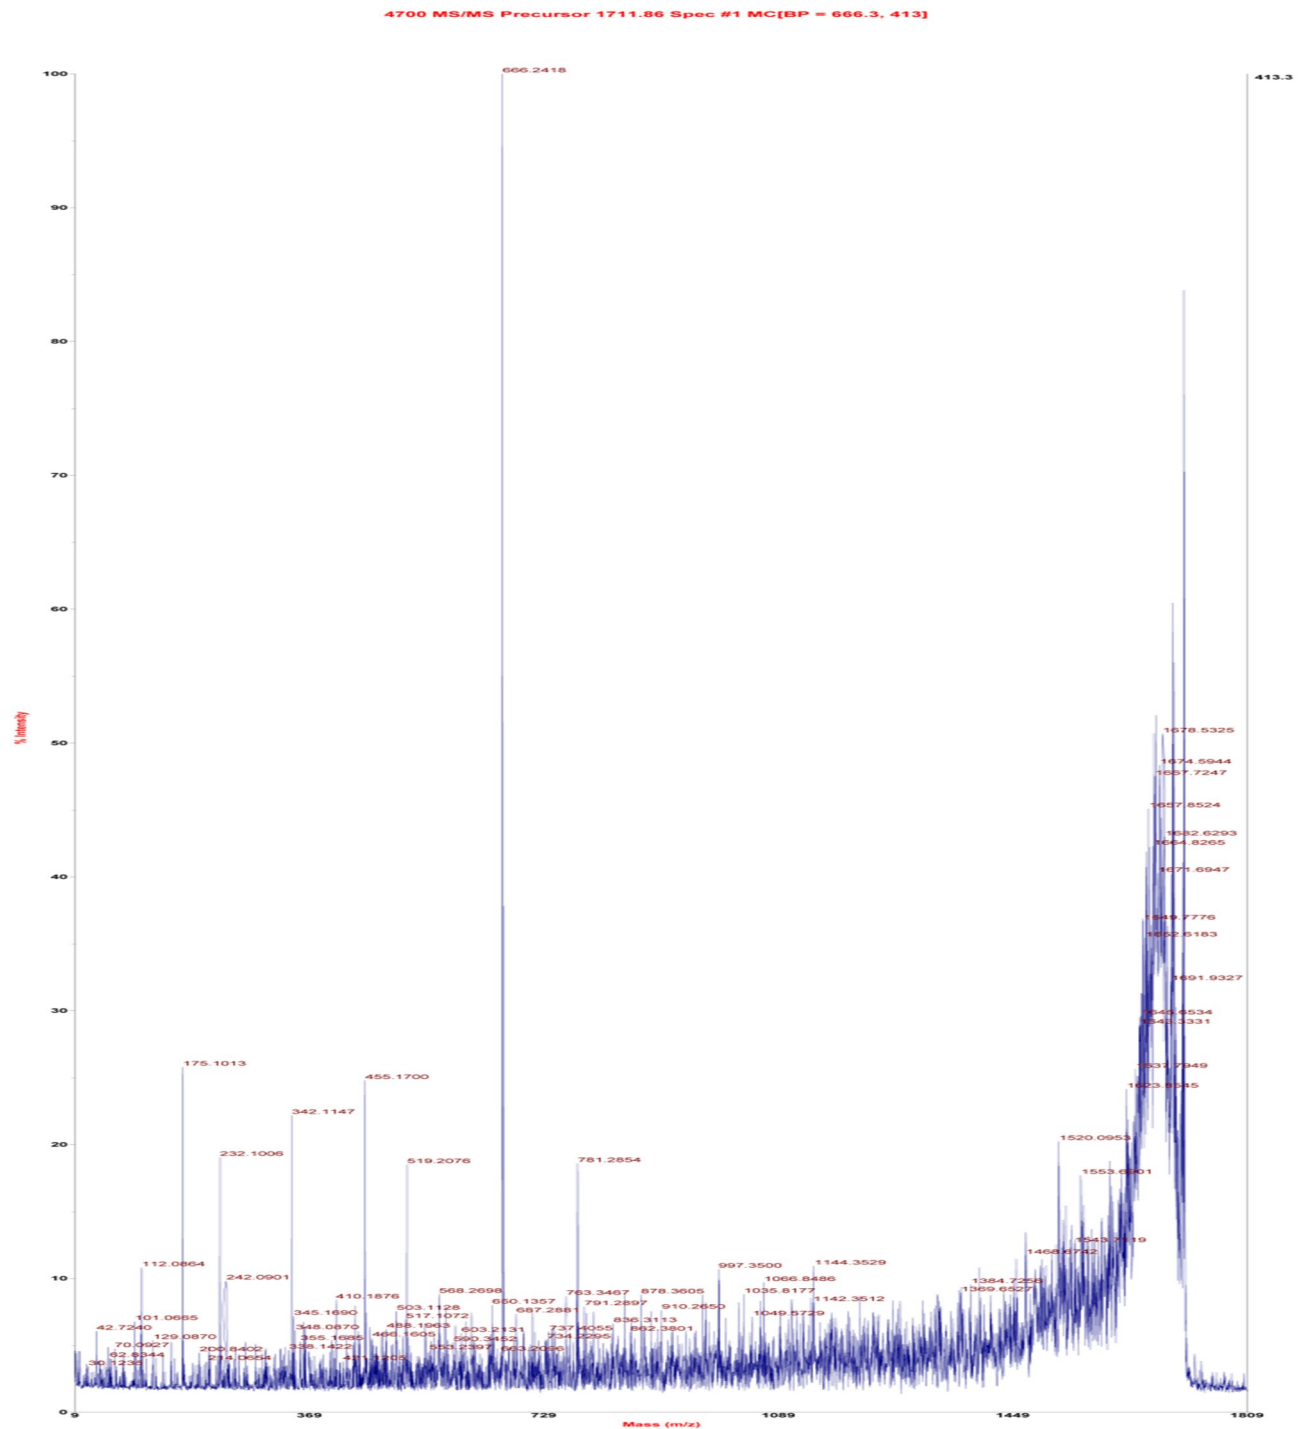

ssp No.: **7934**

sequence identified: **LTDSFLDGTSSVYLEELQR**

the precursor m/z and charge observed: **2173.1211**

score/E-value for this peptide: **133/5.3e-011**

Annotated MS/MS spectra:

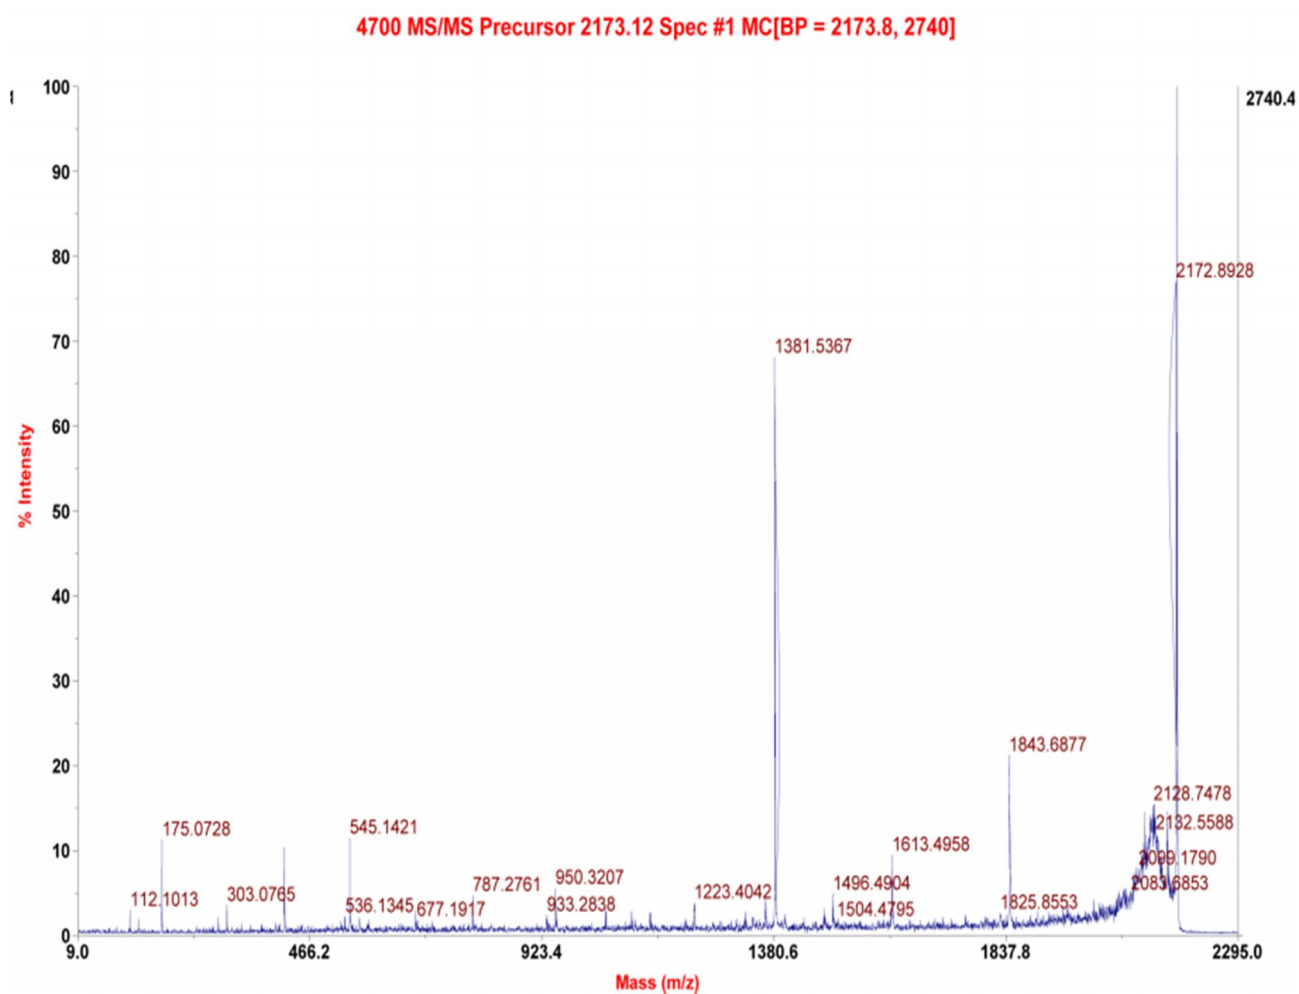

ssp No.: **8314**

sequence identified: **FADINNAYEVLSDSEKR**

the precursor m/z and charge observed: **1970.9670**

score/E-value for this peptide: **114/5.7e-009**

Annotated MS/MS spectra:

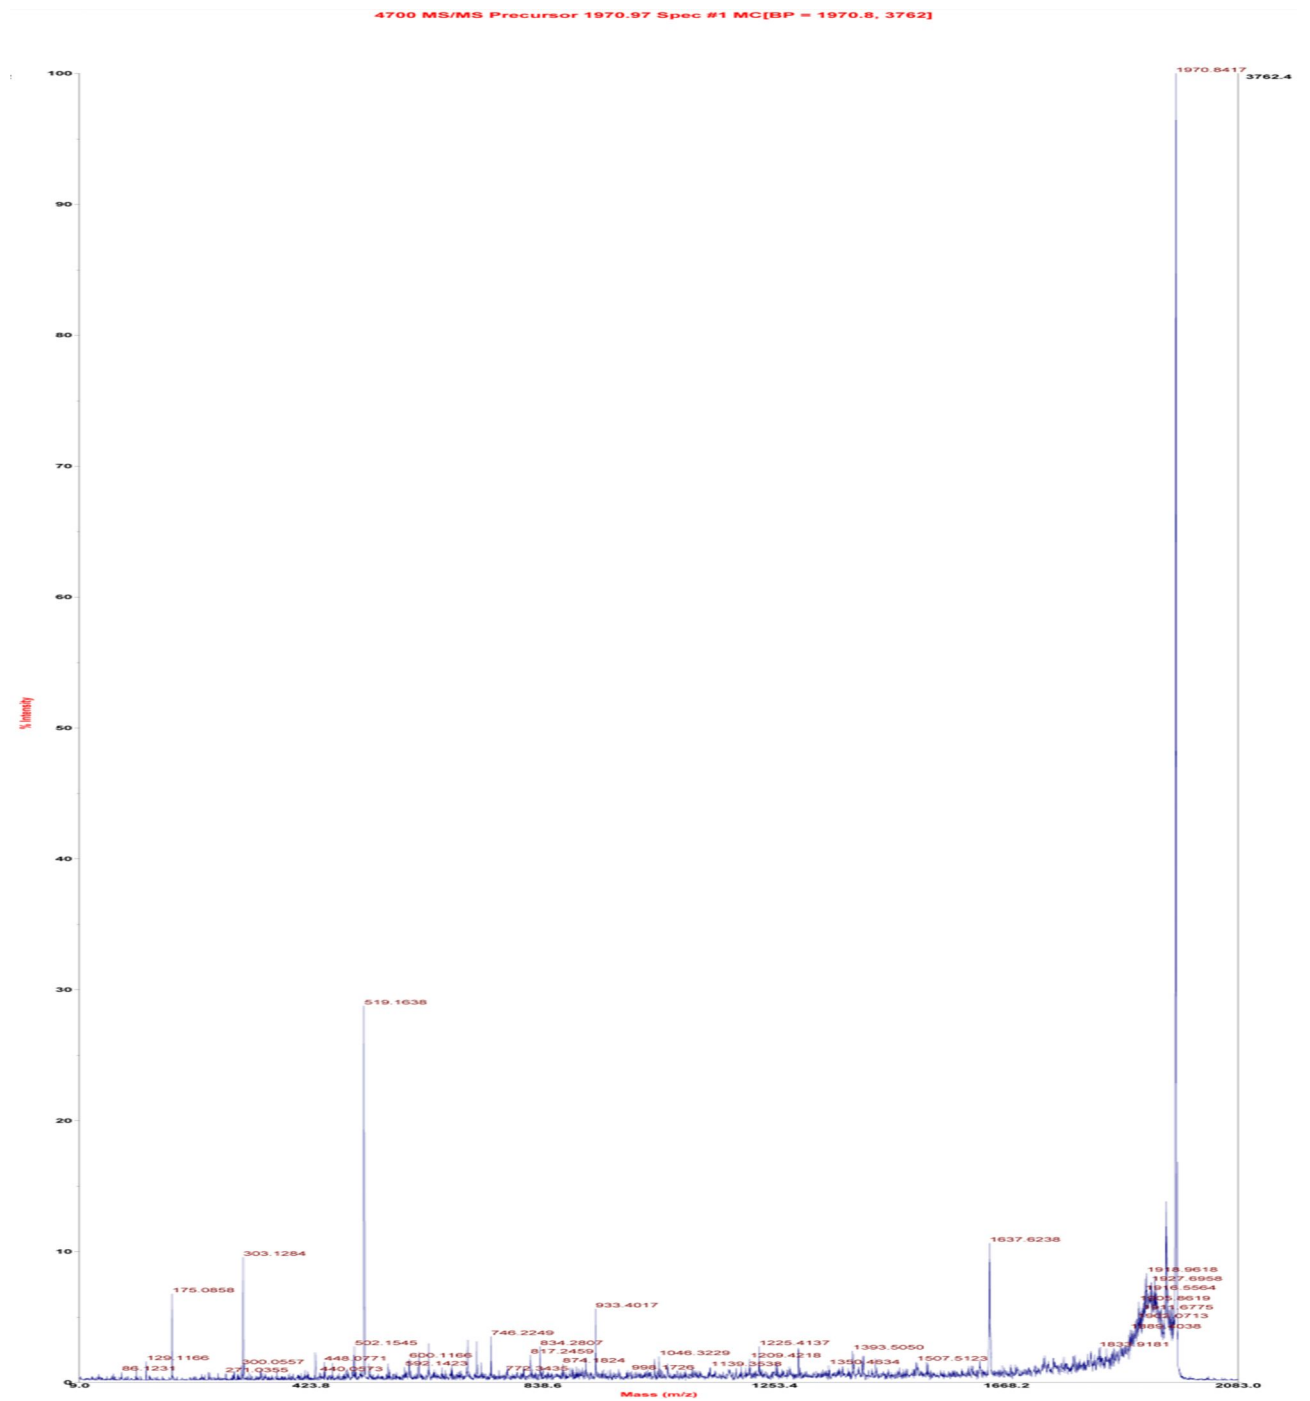

ssp No.: **8801**

sequence identified: **ALPTYTPESPADATR**

the precursor m/z and charge observed: **1589.7849**

score/E-value for this peptide: **62/0.0012**

Annotated MS/MS spectra:

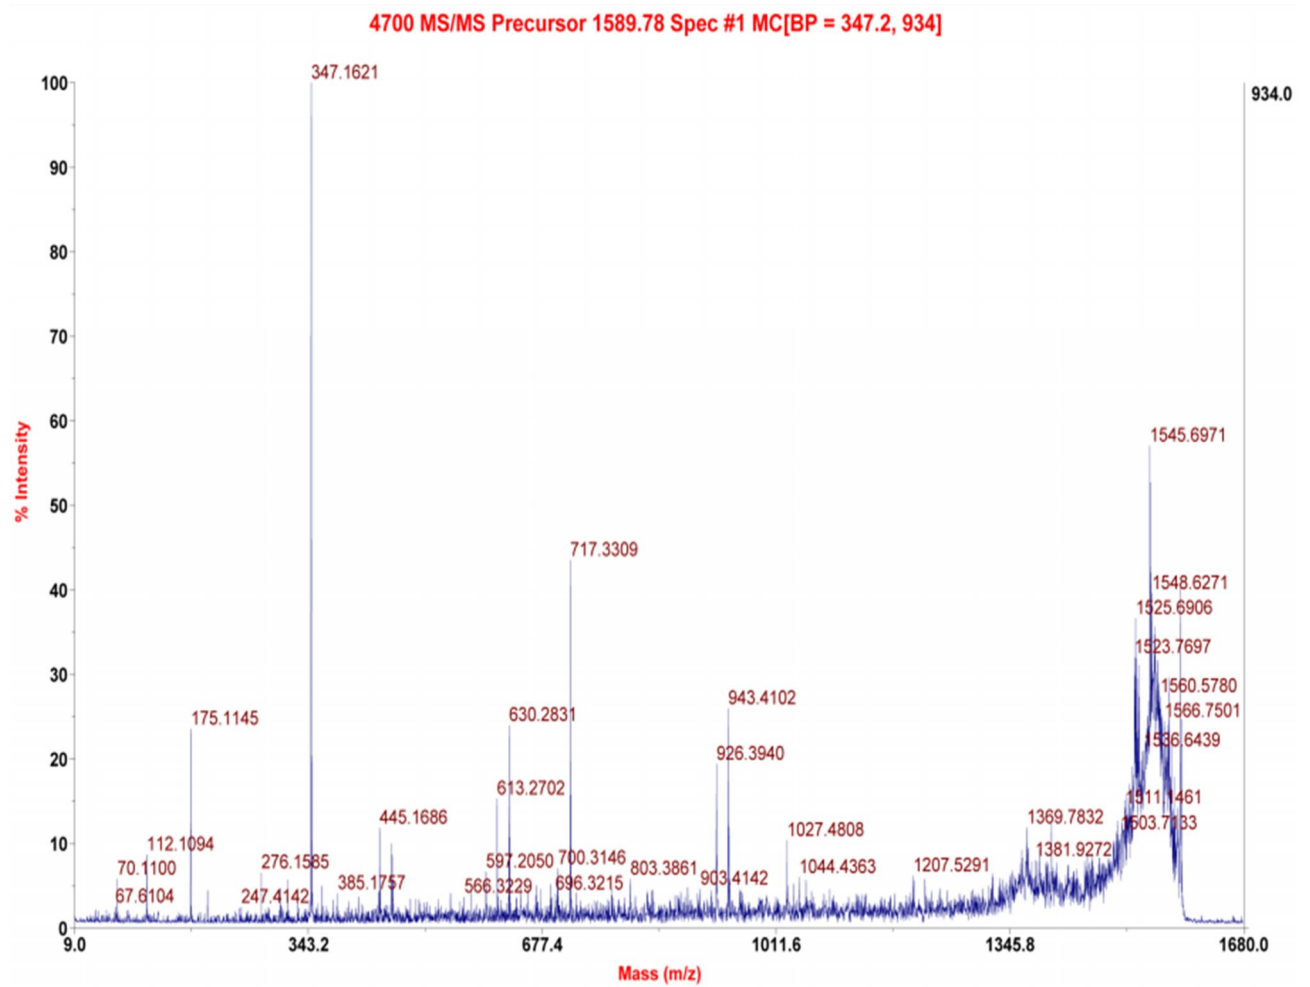

ssp No.: **9418**

sequence identified: **SVSINEFLKPAEGER**

the precursor m/z and charge observed: **1675.9115**

score/E-value for this peptide: **82/1.1e-005**

Annotated MS/MS spectra:

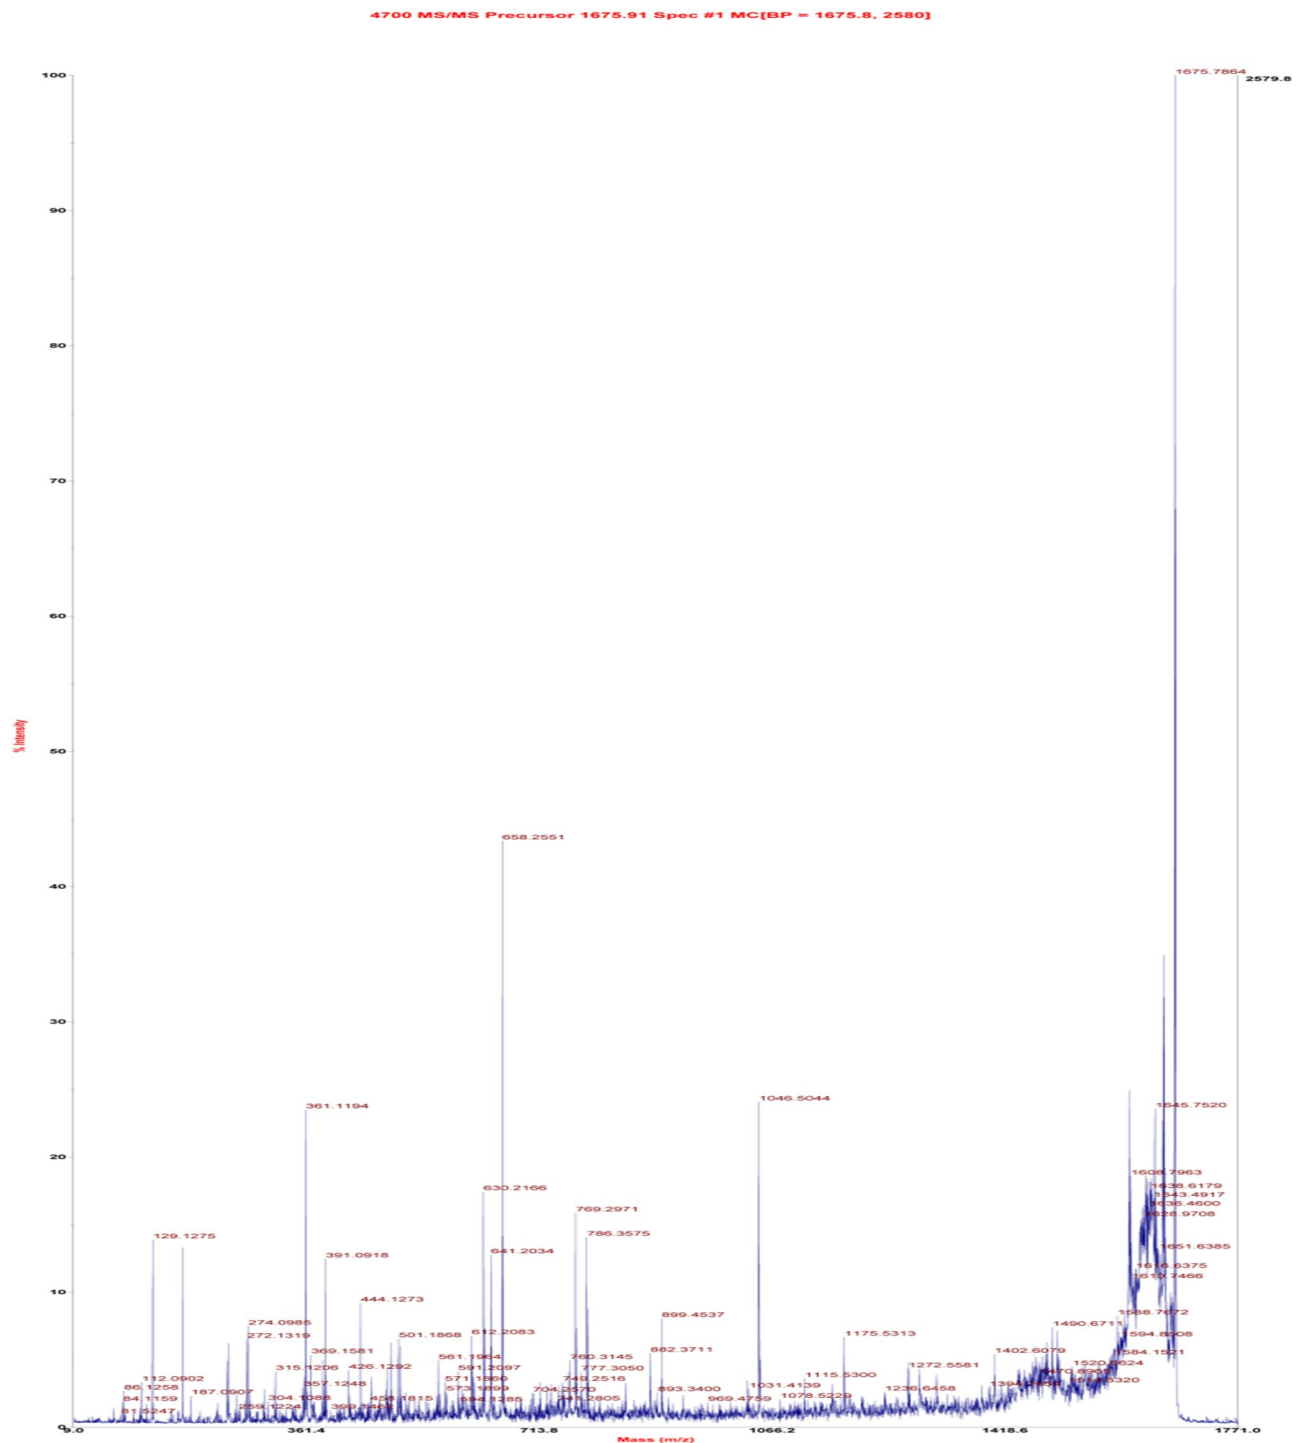

Supplement: supp_M113.031013_mcp.M113.031013-1.pdf [file supp_M113.031013_mcp.M113.031013-1.pdf]
